1 **Mitophagy antagonism by Zika virus reveals Ajuba as a regulator of PINK1-Parkin signaling,**  
2 **PKR-dependent inflammation, and viral invasion of tissues.**

3

4

5 Sanket S. Ponia<sup>1</sup>, Shelly J. Robertson<sup>1</sup>, Kristin L. McNally<sup>1</sup>, Gail L. Sturdevant<sup>1</sup>, Matthew Lewis<sup>1</sup>,  
6 Forrest Jessop<sup>2</sup>, Catherine M. Bosio<sup>2</sup>, Catherine Kendall<sup>1,3</sup>, Dylan Gallegos<sup>1</sup>, Arielle Hay<sup>1</sup>, Cindi  
7 Schwartz<sup>4</sup>, Rebecca Rosenke<sup>5</sup>, Greg Saturday<sup>5</sup>, Craig Martens<sup>4</sup>, and Sonja M. Best<sup>1\*</sup>

8

9 <sup>1</sup>Innate Immunity and Pathogenesis Section, Laboratory of Virology, Rocky Mountain  
10 Laboratories, National Institute of Allergy and Infectious Diseases, NIH, Hamilton, MT 59840.

11 <sup>2</sup>Immunity to Pulmonary Pathogens Section, Laboratory of Bacteriology, Rocky Mountain  
12 Laboratories, National Institute of Allergy and Infectious Diseases, NIH, Hamilton, MT 59840.

13 <sup>3</sup>School of Molecular and Cellular Biology, University of Leeds, Leeds, United Kingdom.

14 <sup>4</sup>Research Technology Branch, Rocky Mountain Laboratories, National Institute of Allergy and  
15 Infectious Diseases, NIH, Hamilton, MT 59840.

16 <sup>5</sup>Rocky Mountain Veterinary Branch, Rocky Mountain Laboratories, National Institute of Allergy  
17 and Infectious Diseases, NIH, Hamilton, MT 59840.

18

19 \*Corresponding and lead author: [sbest@niaid.nih.gov](mailto:sbest@niaid.nih.gov)

20

21

22

23

24

25

26

27

28

29

30 **ABSTRACT**

31 Dysregulated inflammation dominated by chemokine expression is a key feature of disease  
32 following infection with the globally important human pathogens, Zika virus (ZIKV) and dengue  
33 virus, but a mechanistic understanding of how pro-inflammatory responses are initiated is  
34 lacking. Mitophagy is a quality control mechanism that regulates innate immune signaling and  
35 cytokine production through selective degradation of damaged mitochondria. Here, we  
36 demonstrate that ZIKV NS5 antagonizes mitophagy by binding to the host protein Ajuba and  
37 preventing its translocation to depolarized mitochondria where it is required for PINK1  
38 activation and downstream signaling. Consequent mitophagy suppression amplified the  
39 production of pro-inflammatory chemokines through PKR sensing of mitochondrial RNA. In  
40 *Ajuba*<sup>-/-</sup> mice, ZIKV induced early expression of pro-inflammatory chemokines associated with  
41 significantly enhanced dissemination to tissues. This work identifies Ajuba as a critical regulator  
42 of mitophagy, and demonstrates a role for mitophagy in limiting systemic inflammation  
43 following infection by globally important human viruses.

44

45

46

47 **INTRODUCTION**

48 Zika virus (ZIKV), a mosquito-borne flavivirus, was first isolated in Uganda (1957) but underwent  
49 an explosive emergence first affecting pacific islanders of Yap (2007) and French Polynesia  
50 (2013), before being introduced into the Americas via Brazil (2014). Although approximately  
51 80% of infections in adults are asymptomatic or mild, infection can cause the neurological  
52 disorder Guillain-Barré syndrome or result in severe congenital neurological sequelae during  
53 pregnancy (Pierson and Diamond, 2020). Serum biomarkers of acute phase immune responses  
54 are dominated by chemokines that become highly elevated in severe disease (Foo et al., 2018;  
55 Kam et al., 2017; Michlmayr et al., 2017; Michlmayr et al., 2020; Naveca et al., 2018).  
56 Chemokine and other pro-inflammatory responses are critical in leucocyte recruitment and  
57 control of virus infection, although uncontrolled or excessive inflammatory responses are  
58 drivers of immunopathology (Melchjorsen et al., 2003). Therefore, determining the innate

59 immune signaling mechanisms that drive pro-inflammatory chemokine expression following  
60 flavivirus infection is key to understanding flavivirus pathogenesis and development of  
61 therapeutics.

62

63 Mitochondria are critical to the coordination of interferon (IFN) and inflammatory responses to  
64 infection with RNA viruses through two major mechanisms. The first is as a membrane platform  
65 to relay initial detection of viral double stranded RNA (dsRNA) by the RIG-I-like helicases (RLR),  
66 RIG-I and Mda5. Downstream signal transduction requires mitochondrial antiviral signaling  
67 protein (MAVS) on the surface of mitochondria to coordinate the transcriptional activation of  
68 type I and III IFNs (Mills et al., 2017). The second role of mitochondria is through release of  
69 danger associated molecular patterns (DAMPs) (West et al., 2015) including mitochondrial DNA,  
70 RNA, and cardiolipin. These signal through various pattern-recognition receptors (PRRs)  
71 including cGAS-STING, Mda5, protein kinase R (PKR), and the inflammasome (Youle, 2019). Both  
72 RLR- and DAMP-dependent responses are regulated by dynamic remodeling of the  
73 mitochondrial network including fusion to form elongated networks, fission to fragment  
74 mitochondria, and mitophagy to selectively remove irreparably damaged mitochondria through  
75 autophagolysosomal degradation (Harper et al., 2018). Failure to eliminate damaged  
76 mitochondria drives chronic inflammation that is linked to the neurodegenerative diseases such  
77 as Parkinson's disease (PD) and Alzheimer's disease (AD) (Mottis et al., 2019; Sliter et al., 2018).

78

79 The most well characterized pathway of mitophagy is governed by two genes, the kinase PTEN-  
80 induced putative kinase 1 (*PINK1*) and the E3 ubiquitin ligase Parkin (*PRKN*), that are mutated in  
81 familial forms of PD (Harper et al., 2018; Sekine and Youle, 2018). Following loss of  
82 mitochondrial potential, PINK1 accumulates on the surface of depolarized mitochondria where  
83 it activates itself through phosphorylation and then phosphorylates ubiquitin (Ub) on Ser65  
84 (pS65-Ub). pS65-Ub recruits and retains Parkin at the mitochondria, enabling Parkin to be  
85 phosphorylated and activated by PINK1. Parkin then works cooperatively with PINK1 to build  
86 pS65-Ub chains on mitochondrial outer membrane proteins and recruit the  
87 autophagolysosomal machinery that ultimately results in mitochondrial clearance (reviewed in

88 (Harper et al., 2018; Sekine and Youle, 2018)). In the context of RLR signaling, MAVS activation  
89 results in oxidative damage that triggers mitophagy as one mechanism to resolve this response  
90 (Song et al., 2020). To date, viruses have only been shown to increase mitophagy in order to  
91 dampen RLR signaling. However, while examples of viruses that inhibit mitophagy are not  
92 known, retention of damaged mitochondria in infected cells may have major implications to the  
93 host inflammatory response.

94  
95 Here we reveal that ZIKV antagonizes PINK1-Parkin signaling to suppress mitophagy and that  
96 this is directly translated to pro-inflammatory chemokine expression through PKR. We show  
97 that the flavivirus nonstructural protein 5 (NS5) interacts with the cellular protein Ajuba to  
98 suppress PINK1-Parkin dependent mitophagy. Ajuba belongs to the LIM family of proteins  
99 whose demonstrated functions include the relief of Ser/Thr kinase autoinhibition and as  
100 scaffolding adaptor proteins to promote association of multi-protein complexes (Jia et al.,  
101 2020). Ajuba has been identified as an activator of mitotic kinases, including Aurora-A and CDK1  
102 (Chen et al., 2016; Hirota et al., 2003), that also have central functions in mitochondrial  
103 dynamics (Archer, 2013). Our results demonstrate that Ajuba is recruited to mitochondria  
104 following various inducers of mitochondrial stress including MAVS activation where it is  
105 required for efficient activation of PINK1. The consequences of mitophagy antagonism to ZIKV  
106 infection include increased induction of pro-inflammatory chemokines considered to be  
107 biomarkers of ZIKV disease severity in humans. We also show that these chemokine responses  
108 are PKR-dependent, the activation of which occurs in response to increased release of  
109 mitochondrial RNA (mtRNA). Finally, we show that suppressed mitophagy results in earlier  
110 amplification of inflammatory responses in response to ZIKV infection in mice, and facilitates  
111 increased viral invasion of tissues. Together, this work identifies Ajuba as a critical regulator of  
112 mitophagy and demonstrates a systemic role of mitophagy in limiting inflammation and  
113 protection from globally important human viruses in vivo.

114

115

116



117 **RESULTS**

118

119 **Ajuba negatively regulates MAVS expression dependent on mitophagy.**

120 An interaction between Ajuba and the NS5 proteins of flaviviruses was implicated from a yeast  
121 2-hybrid performed using a cDNA library from mouse macrophages (Taylor et al., 2011) (this  
122 aspect is experimentally addressed in Figure 4B). As ZIKV NS5 is multifunctional protein with  
123 central roles in antagonism of host IFN responses (Grant et al., 2016; Xia et al., 2018), we first  
124 examined the potential of Ajuba to regulate RLR-MAVS signaling (Stone et al., 2019; Suthar et  
125 al., 2013). IFN $\beta$  expression can be induced through this pathway in tissue culture by  
126 overexpression of MAVS. *IFNB* mRNA driven by MAVS was reduced by ~84% in the presence of  
127 Ajuba (Figure 1A) and was associated with reduced MAVS expression (Figure 1B). Expression of  
128 a related LIM family member, *LIMD1*, had similar but less pronounced effects on expression of  
129 both MAVS and *IFNB* mRNA, suggesting that members of the LIM family may redundantly  
130 regulate RLR signaling at the level of MAVS. Replication of vesicular stomatitis virus (VSV), often  
131 used as a biological indicator of IFN sensitivity, was lower in human A549 cells depleted for  
132 *AJUBA* or *LIMD1* mRNA expression by siRNAs consistent with a role for Ajuba in negative  
133 regulation of RLR signaling (Supplemental Figure 1). We also observed recruitment of Ajuba to  
134 mitochondria following infection with Sendai virus (Figure 1E), a virus used to trigger the RLR-  
135 MAVS pathway. However, we did not observe an interaction between Ajuba and MAVS by  
136 immunoprecipitation (IP) (data not shown), suggesting that a role for Ajuba may be indirect.  
137 Indeed, ectopic expression of Ajuba in HEK293T cells also reduced the endogenous expression  
138 of an additional integral mitochondrial protein, TIMM44. Ajuba-induced loss of both MAVS and  
139 TIMM44 was recovered in the presence of either bafilomycin A1 (BafA1) or epoxomicin,  
140 inhibitors of lysosome- and proteasome-dependent degradation, respectively (Figure 1D). The  
141 major pathway that utilizes both of these cellular degradation pathways is mitophagy. Here, the  
142 proteasome degrades outer membrane mitochondrial proteins ubiquitinated by Parkin,  
143 whereas lysosomes fused to autophagosomes ultimately degrade damaged mitochondria  
144 (Harper et al., 2018; Sekine and Youle, 2018). Consistent with a role in mitophagy, Ajuba  
145 expression did not alter MAVS expression in HeLa cells that are naturally deficient in Parkin

146 (Heo et al., 2015; Ordureau et al., 2014). MAVS degradation was restored following expression  
147 of wild-type Parkin, but not the C431F active site mutant (Figure 1E). As MAVS signaling is  
148 negatively regulated by mitophagy (He et al., 2019; Yang et al., 2018), these results raise the  
149 possibility that Ajuba regulates mitophagy more generally rather than having a specific role in  
150 RLR-MAVS antiviral responses.

151

### 152 **Ajuba is regulated by PINK1-Parkin-mediated degradation during mitophagy.**

153 To determine if Ajuba responds generally to mitochondrial damage, mitophagy competent  
154 HEK293T cells expressing Ajuba were treated with carbonyl cyanide m-chlorophenyl hydrazone  
155 (CCCP) that acts as a proton ionophore to depolarize mitochondrial membrane potential  
156 (Fujimaki et al., 2018). CCCP treatment induced translocation of Ajuba from the cytosol to  
157 mitochondria-enriched fractions in less than 30 min post treatment (Figure 2A). Similar to  
158 overexpression of MAVS, treatment of cells with additional inducers of oxidative stress,  
159 tunicamycin and oligomycin, also resulted in reduced expression of integral mitochondrial  
160 proteins Mfn1 and TIMM44 in the presence of Ajuba, but not the ER-resident calreticulin  
161 (Figure 2B). This suggests that Ajuba responds generally to oxidative stress to specifically  
162 promote mitochondrial degradation. In Figures 1E and 2B, we also observed reduced  
163 expression of Ajuba when mitophagy was induced for periods longer than 6 h. To examine this  
164 more closely, HEK293T cells expressing Ajuba were treated with CCCP or starved to induce bulk  
165 autophagy for 6 h and treated with inhibitors of degradation. The CCCP-induced reduction of  
166 Ajuba and Mfn1 was dependent on both lysosome- and proteasome-mediated degradation.  
167 However, expression of Ajuba or Mfn1 was not responsive to bulk autophagy as evidenced by  
168 starvation-induced degradation of the ER-resident autophagy receptor, FAM134B (Khaminets et  
169 al., 2015) that is rescued by lysosome inhibition only (Figure 2C). Thus, Ajuba responds  
170 specifically to mitochondrial damage. To determine if Ajuba degradation during mitophagy was  
171 dependent on PINK1 or Parkin, Ajuba was expressed in the well-established HeLa cell model  
172 lacking either protein (Heo et al., 2015). Both basal expression and CCCP-dependent  
173 degradation of Ajuba were dependent on PINK1 and Parkin, with Ajuba degradation responding  
174 to CCCP and the presence of PINK1 or Parkin in a manner similar to Mfn1 (Figure 2D). To

175 determine if Ajuba has a role in mitochondrial function, we generated an Ajuba<sup>-/-</sup> mouse model  
176 (Supplementary Figure 2), and measured oxygen consumption rates (OCR) by Seahorse  
177 Bioanalyzer assays in age-matched WT, Ajuba<sup>-/-</sup> or PINK1<sup>-/-</sup> mouse embryonic fibroblasts (MEFs)  
178 (Figure 2E, F). Measures of basal respiration ATP-linked respiration, proton leak, spare  
179 respiratory capacity and non-mitochondrial respiration were similar between the three MEF  
180 genotypes. However, Ajuba<sup>-/-</sup> MEFs demonstrated increased maximal respiration, thereby  
181 confirming that Ajuba regulates mitochondrial function. Taken together, these results suggest  
182 that Ajuba responds to a variety of mitochondrial stressors by translocating to mitochondria,  
183 where it is subsequently degraded during PINK1/Parkin-dependent mitophagy.

184

#### 185 **Ajuba interacts with PINK1 to promote PINK1 autophosphorylation and mitophagy.**

186 To determine if Ajuba is required for mitophagy, Ajuba<sup>-/-</sup> MEFs were labeled simultaneously  
187 with Mitotracker red and Mitotracker green, treated with CCCP, and the quenching of green  
188 fluorescence following acidification in lysosomes was measured by flow cytometry (Sprung et  
189 al., 2018). Mitochondrial mass was not different in resting MEFs as measured by Mitotracker  
190 green mean fluorescence intensity (MFI) (Figure 3A). However, as indicated by the shift in ratio  
191 of red:green MFI following CCCP treatment, mitophagy was reduced in Ajuba<sup>-/-</sup> MEFs, and not  
192 different from WT MEFs treated with CCCP and BafA1 to inhibit lysosomal acidification (Figure  
193 3B). This finding suggests that depolarized mitochondria are not delivered efficiently to  
194 lysosomes in the absence of Ajuba.

195

196 To determine a functional role for Ajuba in PINK1-Parkin signaling, we turned to the  
197 characterized cellular role of Ajuba in relief of kinase autoinhibition, particularly mitotic kinases  
198 such as Aurora-A (Kashatus et al., 2011). Similar to these mitotic kinases, human PINK1 is a  
199 Ser/Thr kinase whose resting state is in an autoinhibited conformation. However, the  
200 mechanism(s) by which this autoinhibition is relieved following stabilization on the outer  
201 mitochondrial membrane is not completely characterized (Harper et al., 2018). We  
202 hypothesized that once at the mitochondria, Ajuba may bind to PINK1 and function in its  
203 recognized role of kinase activation. Ajuba and PINK1 expressed from *E. coli* interacted directly

204 with each other by reciprocal co-IP (Figure 3C), a finding that was supported by co-localization  
205 of the two proteins in cells by immunofluorescence assay (IFA) (Supplemental Figure 3A).  
206 Importantly, *E.coli*-expressed PINK1 has low autophosphorylation activity (Rasool et al., 2018),  
207 but auto-phosphorylation of PINK1 at Thr257 significantly increased when PINK1 was incubated  
208 with increasing levels of Ajuba (Figure 3D,E). Ajuba can be phosphorylated by the kinase with  
209 which it interacts (Chen et al., 2016) prompting us to test if PINK1 phosphorylates Ajuba  
210 following coexpression by IP and mass-spectrometry. Based on the PINK1 phosphorylation  
211 consensus sequence (Torii et al., 2020), two residues in the pre-LIM domain of Ajuba are  
212 predicted to be phosphorylated by PINK1, S39 and S136. Coexpression of PINK1 with Ajuba  
213 resulted in a higher molecular mass form of Ajuba (Band 'B'; Supplemental Figure 3B). Peptides  
214 visible by mass spectrometry spanned an average of 48% of Ajuba (range 29-63%) and included  
215 both of these residues, but only S39 was specifically phosphorylated in the presence of PINK1  
216 and not TBK1, another Ser/Thr kinase used as a control (Supplemental Figure 3B). These results  
217 demonstrate direct and functional interactions between Ajuba and PINK1.

218

219 To determine if Ajuba affects PINK1 function in cells, we developed an IFA to quantify pSer65-  
220 Ub in individual cells. HeLa cells were transfected with HA-Ub, treated with CCCP and stained  
221 for pSer65-Ub. The number of puncta were then counted per cell. The assay was validated in  
222 HeLa cells lacking either PINK1 or Parkin, demonstrating that pSer65-Ub puncta were  
223 dependent on both proteins and coupled to mitochondrial depolarization (Figure 3F,G). Ajuba  
224 expression did not induce spontaneous pSer65-Ub puncta, but did increase pSer65-Ub  
225 accumulation in CCCP-treated cells compared to a GFP control (Figure 3H). In addition, ectopic  
226 expression of Ajuba increased the total level of pSer65-Ub in CCCP-treated cells (Figure 3I).  
227 Taken together, these results suggest that Ajuba is required for efficient mitophagy and  
228 functions by directly interacting with PINK1 to promote pSer65-Ub accumulation.

229

### 230 **Zika virus NS5 binds to Ajuba to suppress mitophagy.**

231 To examine the role of Ajuba in mitophagy further, we first determined the effect of ZIKV  
232 replication on mitophagy. CCCP-induced pSer65-Ub puncta were markedly reduced in ZIKV-

233 infected cells, suggesting that ZIKV exerts a strong block to mitophagy (Figure 4A). To  
234 determine if this was associated with NS5 binding to Ajuba, we first confirmed the interaction.  
235 IP of Ajuba resulted in coprecipitation of ZIKV NS5 in HEK293T cells (Figure 4B). ZIKV NS5  
236 localizes mainly to the nucleus, but low levels of cytosolic NS5 could be observed co-localizing  
237 with Ajuba following co-expression (Figure 4C). Consistent with viral inhibition of mitophagy,  
238 ZIKV NS5 reduced accumulation of Ajuba as well as Parkin (used as a downstream target of  
239 PINK1) in the mitochondrial fraction following treatment of cells with CCCP (Figure 4D). We  
240 also examined localization of Ajuba by IFA with and without NS5 when using MAVS as a  
241 stimulus for mitochondrial depolarization. When expressed alone, MAVS localized to  
242 mitochondria and caused mitochondrial aggregation (Figure 4E). When Ajuba and MAVS were  
243 coexpressed in the same cell, Ajuba appeared to interweave with the mitochondrial marker  
244 TOM20 and disrupt aggregates of MAVS (Figure 4F). However, coexpression of ZIKV NS5  
245 suppressed mitochondrial recruitment of Ajuba in MAVS-positive cells (Figure 4G). These  
246 results suggest that ZIKV imparts a remarkable block to mitophagy that is mediated by NS5  
247 binding to Ajuba to suppress its recruitment to depolarized mitochondria.

248

249 **Suppression of mitophagy results in mtRNA release, PKR phosphorylation and PKR-**  
250 **dependent chemokine expression.** Perhaps one of the most significant consequences of viral  
251 antagonism of mitophagy and failure to clear damaged mitochondria from infected cells is the  
252 potential to amplify inflammatory responses (Moehلمان and Youle, 2020). To determine the  
253 consequence of the viral block in mitophagy, we first performed RNAseq in ZIKV-infected WT,  
254 Ajuba<sup>-/-</sup> or PINK1<sup>-/-</sup> MEFs. In both mock- and ZIKV-infected cells, the majority of differentially  
255 regulated genes (DEGs) were commonly observed in PINK1<sup>-/-</sup> and Ajuba<sup>-/-</sup> cells, providing  
256 additional evidence that the two proteins function in the same pathway (Figure 5A,B). Notably,  
257 ZIKV-infected PINK1<sup>-/-</sup> and Ajuba MEFs<sup>-/-</sup> demonstrated increased activation of antiviral and  
258 inflammatory pathways (Supplementary Figure 4A). Specifically, chemokines recognized as  
259 hallmarks of human infection with ZIKV (Foo et al., 2018; Kam et al., 2017; Michlmayr et al.,  
260 2020) were increased by 72 hpi in the absence of Ajuba or PINK1 (Figure 5C and Supplemental  
261 Figure 4B). Increased chemokine expression appeared independent of substantial increases in

262 virus replication even when IFN signaling was blocked, as measured by release of infectious  
263 virus (Figure 5D,E).

264

265 The lack of major differences in viral replication suggests that increased chemokine responses  
266 may result from mitochondrial DAMPs. Compared to WT MEFs, mitochondria in ZIKV-infected  
267 Ajuba<sup>-/-</sup> MEFs contained disorganized cristae and loss of double membrane structure suggesting  
268 considerable damage (Figure 5F). We also noted from the RNAseq data upregulation of the  
269 pathway 'Role of PKR in IFN induction and antiviral response' in ZIKV-infected Ajuba- and  
270 PINK1-knockout MEFs (Supplementary Figure 4B, C). PKR is a stress-associated kinase that binds  
271 to double stranded RNA (dsRNA) of viral or mitochondrial origin (Kim et al., 2018), or it can be  
272 separately activated as part of the integrated stress response (ISR) (Hou et al., 2017). Activated  
273 PKR then phosphorylates eIF2 $\alpha$  to induce expression of the stress associated transcription  
274 factor, ATF4 (Pakos-Zebrucka et al., 2016). In support of the RNAseq data, PKR phosphorylation  
275 and ATF4 expression were elevated basally in uninfected Ajuba<sup>-/-</sup> and PINK1<sup>-/-</sup> MEFs, and further  
276 increased by ZIKV infection (Figure 5 G,H). Mitochondrial RNA (mtRNA) can be visualized using  
277 the J2 mAb with high specificity (95-99%) in cultured cells (Dhir et al., 2018). Compared to WT  
278 MEFs, mtRNA staining was both increased in intensity and localized outside of mitochondria in  
279 the absence of either Ajuba or PINK1 even without additional stimulus for depolarization by  
280 CCCP treatment (Figure 5I). To determine if PKR is activated by mtRNA, cells were treated with  
281 ethidium bromide (EthBr) to deplete mitochondrial RNA as evidenced by reduced expression of  
282 the mitochondrially encoded cytochrome B, but not the nuclear encoded Mfn1. Depletion of  
283 mtRNA also suppressed PKR phosphorylation without affecting total PKR expression in ZIKV-  
284 infected MEFs (Figure 5 J,K). Taken together, these results provide evidence for release of  
285 mtRNA to the cytosol when mitophagy is compromised in primary cells resulting in PKR  
286 activation.

287

288 To understand how ZIKV replication, PKR activation, and cytokine expression are linked, we  
289 infected primary human dermal fibroblasts with ZIKV and treated the cells with inhibitors of  
290 PKR (C16) or eIF2 $\alpha$  (ISRIB) phosphorylation (Gal-Ben-Ari et al., 2018; Rabouw et al., 2019). Both

291 inhibitors reduced virus replication consistent with the established roles of PKR in  
292 phosphorylating eIF2 $\alpha$  (Gal-Ben-Ari et al., 2018) and the known pro-viral role of stress  
293 responses that drive eIF2 $\alpha$  phosphorylation (Ambrose and Mackenzie, 2011, 2013; Hou et al.,  
294 2017)(Figure 6A-C). However, we were surprised to observe that expression of multiple  
295 chemokines including CXCL10, CXCL1, CXCL12, CCL2, CCL4, and CCL5, as well as select cytokines  
296 (IL-1 $\alpha$  and IL-18) were highly dependent on PKR but not eIF2 $\alpha$  (Figure 6D-E). Indeed, inhibition  
297 of eIF2 $\alpha$ -phosphorylation exacerbated chemokine and cytokine expression, consistent with  
298 failure to resolve cellular stress through the ISR. Importantly, as virus replication was reduced in  
299 both C16- and ISRIB-treated cells, these findings uncouple virus replication from the  
300 inflammatory response and support the finding that mtRNA/DAMP signaling is a significant  
301 driver of PKR-dependent inflammation. Our data suggests that ZIKV suppression of mitophagy  
302 amplifies the ISR which is favorable for flavivirus replication. However, PKR activation in  
303 response to mitochondrial damage serves to amplify the pro-inflammatory chemokine response  
304 that is the hallmark of flavivirus infection.

305

306 **Pro-inflammatory chemokines are expressed earlier in ZIKV-infected *Ajuba*<sup>-/-</sup> mice associated**  
307 **with increased virus dissemination to tissues.** To determine the consequences of suppressed  
308 mitophagy in vivo, we examined the kinetics of induction of pro-inflammatory cytokines in  
309 *Ajuba*-deficient mice. Using RNAscope assays, *Ajuba* mRNA expression was particularly enriched  
310 in epithelial cells of the skin (keratinocytes) and testes (Sertoli cells), and in epithelial and  
311 endothelial cells of the lung. *Ajuba* was also expressed in hepatocytes and endothelial cells of  
312 the liver, and ependymal cells, neurons, and epithelial cells in the CNS (Supplementary Figure  
313 5). Thus, *Ajuba* is expressed in flavivirus target cells and organs. To determine if effects on  
314 inflammation can be observed in vivo, WT and *Ajuba*<sup>-/-</sup> mice were treated with anti-IFNAR  
315 (MAR1) mAb one day prior to footpad inoculation with ZIKV to examine responses in the  
316 absence of IFN as a confounding factor in mouse models of ZIKV infection (Gorman et al., 2018;  
317 Grant et al., 2016). Viremia was equivalent at 3 and 5 dpi (Figure 7B). However, acute response  
318 chemokines were either significantly elevated (CXCL1, CXCL10, CCL7) or trending higher (CCL5,  
319 CXCL2) in serum at 3dpi (Figure 7A). In contrast, production of late response cytokines like IFN $\gamma$



320 were not affected (Figure 7A). We next examined virus burden in tissues. This revealed the  
321 striking finding that virus titers in target tissues including the spleen and brain were up to 80-  
322 fold higher at 3dpi in *Ajuba*<sup>-/-</sup> mice, despite no differences in viremia. However, by 5 dpi, ZIKV  
323 titers in tissues were generally not different between WT and *Ajuba*<sup>-/-</sup> mice, demonstrating that  
324 there is no intrinsic advantage to virus replication (Figure 7B). These results suggest that  
325 suppression of mitophagy by ZIKV facilitates virus invasion of tissue. The pre-treatment of mice  
326 with anti-IFNAR mAb suggests that the difference in cytokine expression and virus  
327 dissemination at 3 dpi is largely independent of type I or III IFNs, and the equivalent viremia  
328 suggests that elevated chemokine expression in serum is not driven by increased viral pattern-  
329 associated molecular patterns (PAMPs). Instead, these findings suggest that inhibition of *Ajuba*  
330 and suppressed mitophagy by ZIKV amplifies early expression of acute response chemokines in  
331 vivo and that this inflammation is strongly linked to DAMP signaling and virus invasion of  
332 tissues.

333

334

## 335 **DISCUSSION**

336

337 By studying virus-host interactions, this work identifies *Ajuba* as a critical regulator of PINK1-  
338 Parkin-dependent mitophagy. *Ajuba* participated in mitophagy following multiple stressors,  
339 including ER-stress, MAVS activation, or direct mitochondrial depolarization, suggesting that  
340 *Ajuba* is generally important to mitochondrial quality control. ZIKV suppressed PINK1-Parkin-  
341 dependent mitophagy early in the pathway prior to the accumulation of pSer65-Ub, consistent  
342 with a role for *Ajuba* in positive regulation of PINK1 activation. PINK1 activation following  
343 accumulation on mitochondrial membranes results from self-phosphorylation of the activation  
344 loop *in trans* presumably as the local concentration of PINK1 increases (Sekine and Youle,  
345 2018). However, we provide several lines of evidence that *Ajuba* may function to further  
346 augment PINK1 activation including demonstration of a direct interaction between PINK1 and  
347 *Ajuba*, augmentation of both PINK1 autophosphorylation *in vitro* and pSer65-Ub in cells by  
348 *Ajuba*, and RNAseq data suggesting that PINK1 and *Ajuba* function in overlapping regulatory



349 cascades. While the most widely conserved regulatory mechanism for Ser/Thr kinase activation  
350 is phosphorylation of kinase activation loop residues, stabilization of conformational changes  
351 occurs following kinase binding to cofactors that independently increase kinase activity by up to  
352 several hundred-fold (Dodson and Bayliss, 2012; Zorba et al., 2014). Additional careful  
353 biochemical studies are needed to determine the precise relationship between PINK1 and  
354 Ajuba. However, the identified interaction suggests a potential mechanism for further  
355 stabilization of PINK1 conformation to ensure a regulated acceleration of kinase activity, as  
356 observed for Aurora-A (Ruff et al., 2018). Further definition of Ajuba's role in PINK1-Parkin  
357 signaling may reveal new avenues for therapeutic interventions in PD.

358  
359 The consequences of damaged mitochondria to inflammation is currently of intense scientific  
360 interest due to the central role of these processes in neurological disorders (e.g. PD, and AD)  
361 and cellular transformation. The mechanisms of inflammation are linked to the ancient origins  
362 of mitochondria as  $\alpha$ -proteobacterium, and are mediated through DAMP activation of innate  
363 immune signaling pathways (Mottis et al., 2019; Youle, 2019). For example, mitochondrial DNA  
364 is sensed through cGAS-STING, a process that is amplified in PINK1<sup>-/-</sup> or PARK2<sup>-/-</sup> deficient mice  
365 following metabolic stress (Sliter et al., 2018). mtRNA is also released and can be sensed by PKR  
366 or Mda5 (Dhir et al., 2018; Kim et al., 2018). PKR activation by mtRNA and downstream eIF2 $\alpha$   
367 phosphorylation has been shown, but role for PKR sensing of mitochondrial health as a central  
368 amplifier of chemokine expression during virus infection has not been previously reported.  
369 Here, by investigating interactions between ZIKV and mitochondria, we reveal that viral  
370 antagonism of mitophagy is directly translated to inflammation through PKR-sensing of mtRNA.  
371 Moreover, we show that viral antagonism of mitophagy is a key determinant of virus invasion of  
372 tissues linked to pro-inflammatory chemokine responses.

373  
374 Pro-inflammatory chemokine expression is linked to disease severity in humans infected with  
375 ZIKV, DENV and YFV (Foo et al., 2018; Kam et al., 2017; Michlmayr et al., 2017; Michlmayr et al.,  
376 2020; Naveca et al., 2018) although the molecular mechanisms leading to their initial  
377 expression are not well defined. As chemokines are ultimately responsible for coordinating

378 leucocyte recruitment and activation, determining the early events that drive chemokine  
379 expression is a key question in flavivirus pathogenesis. Here we reveal that pro-inflammatory  
380 chemokine responses are amplified in ZIKV-infected cells through PKR sensing of damaged  
381 mitochondria that are actively retained in cells through viral inhibition of mitophagy. CXCL10  
382 and CCL2 have been specifically linked to symptomatic ZIKV infection during pregnancy and  
383 congenital abnormalities (Foo et al., 2018; Kam et al., 2017; Naveca et al., 2018). In addition,  
384 CXCL10, CCL2, CCL5 and IL-10 have been identified as the central cytokines connecting temporal  
385 changes in cell populations and gene expression in the context of ZIKV-infected Nicaraguan  
386 children (Michlmayr et al., 2017; Michlmayr et al., 2020). Strikingly, compared to WT mice,  
387 *Ajuba*<sup>-/-</sup> mice exhibited an earlier amplification of these same cytokines including CXCL10, CCL2,  
388 CCL5, and CXCL1 that were similarly elevated at early-acute times in the Nicaraguan cohort,  
389 with CCL2, and CXCL10 remaining high during late-acute phase of infection in humans and in  
390 our mouse model. Severe disease following flavivirus infection generally occurs after peak virus  
391 burden in blood (Tricou et al., 2011). The reasons for this are multifaceted, but our results  
392 suggest a specific mechanism for sustained inflammation in tissues due to compromised  
393 mitophagy and increased DAMP signaling. As illustrated by infection of primary human  
394 fibroblasts, once this signaling is initiated, even a reduction in virus titer through inhibition of  
395 the ISR was not sufficient to suppress chemokine expression. Evidence for these processes in  
396 humans has been observed in placental tissues from ZIKV-infected mothers including  
397 mitochondrial dysfunction, metabolic alterations and induction of inflammatory mediators  
398 (Chen et al., 2020). The current work identifies a molecular mechanism for these observations  
399 encoded through ZIKV NS5 to amplify mitochondrial stress responses in infected tissue  
400 (Supplementary Figure 6). Thus, pathways of mitophagy and DAMP signaling are identified as  
401 potential therapeutic targets in severe flavivirus disease.

402

403 Multiple viruses increase mitophagy as a strategy to evade the IFN response (Zhang et al.,  
404 2018). Thus, the finding that ZIKV inhibits mitophagy to maintain damaged mitochondria in cells  
405 and amplify inflammatory signaling cascades is surprising. The observation that ZIKV encodes at  
406 least two mechanisms to manipulate mitochondrial dynamics through NS5 (this paper) and NS4B

407 suppression of mitochondrial fission (Chatel-Chaix et al., 2016) suggests that mitochondrial  
408 functions are important to virus biology. The pro-viral function of impaired mitophagy will be  
409 associated in part with amplification of the ISR as a known factor that favors flavivirus  
410 replication through suppression of host mRNA translation (McEwen et al., 2005). However, we  
411 observed no fundamental advantage to virus replication in primary MEFs or in mouse tissues  
412 lacking Ajuba. Instead, we found that the major consequence of suppressed mitophagy in vivo  
413 is to facilitate virus invasion of tissues. The precise events required for flavivirus invasion of  
414 critical tissues are not understood (Ayala-Nunez and Gaudin, 2020), although experimental  
415 evidence suggests that inflammatory responses could increase virus transmigration across  
416 endothelial barriers (Miner and Diamond, 2016). We observed an 80- and 16-fold increase in  
417 virus burden in the spleen and brain, respectively, at 3 dpi in *Ajuba*<sup>-/-</sup> mice. This increase was  
418 independent of viremia levels, intrinsic differences in virus replication, or IFNAR1 signaling, but  
419 was associated with earlier expression of chemokines that are considered hallmarks of  
420 monocyte recruitment and activation. Monocytes are primary targets for flavivirus infection in  
421 the blood (Michlmayr et al., 2017), and ZIKV has been shown to increase monocyte adhesion  
422 and transmigration across endothelial barriers (Ayala-Nunez et al., 2019). We therefore  
423 speculate that monocyte activation increases tissue seeding of virus. Once in tissues, it is  
424 possible that retention of damaged mitochondria in infected cells further promotes tissue  
425 injury. To further address these fundamental questions in flavivirus pathogenesis, it will be  
426 important to determine the spatial and temporal kinetics of chemokine expression, ZIKV  
427 infection and monocyte activation status in blood and key tissues.

428  
429 In summary, we have shown that ZIKV NS5 antagonizes mitophagy by binding to the host  
430 protein Ajuba and thereby prevents Ajuba translocation to depolarized mitochondria where it is  
431 required for PINK1-Parkin signaling. The consequences of this to ZIKV include increased DAMP  
432 signaling and increased viral dissemination to tissues. It is well established that viral PAMPs  
433 initiate pro-inflammatory responses (Gilfoy and Mason, 2007; Samuel et al., 2006). However,  
434 our results suggest that mitochondrial stress leading to release of DAMPs is responsible for  
435 amplification of specific chemokines following flavivirus infection, and that this is tightly

436 associated with viral invasion of tissues. Suppression of mitophagy also provides a potential  
437 selection pressure for development of flavivirus strategies to antagonize IFN responses  
438 downstream of mitochondria including suppression of cGAS-STING signaling to mitigate mtDNA  
439 release (Aguirre et al., 2017; Aguirre et al., 2012; Yu et al., 2012), and the property of NS5 as a  
440 very potent JAK-STAT antagonist to suppress downstream IFN signaling in infected cells (Best,  
441 2017). In addition, ZIKV encodes blocks to RLR-MAVS signaling downstream of MAVS, including  
442 suppression of TBK1 and IRF3 activation (Xia et al., 2018). Moreover, these findings raise new  
443 potential mechanisms of immune activation and dysfunction in the context of flavivirus  
444 infection based on recognized roles of mitophagy in suppressing DAMP-driven responses and  
445 autoimmunity (reviewed in (Mottis et al., 2019; Youle, 2019). Finally, our findings illustrate a  
446 role of mitophagy in protection from inflammatory responses and virus infection in vivo,  
447 beyond the context of neurodegeneration. It is noteworthy that therapeutics aimed at  
448 augmentation of mitophagy improve cellular function in animal models of AD (Fang et al.,  
449 2019). Thus, therapeutics under development for PD, AD and other disorders of mitochondrial  
450 dysfunction should be considered for testing in flavivirus infection models. In this case,  
451 augmented mitophagy may dampen pro-inflammatory responses and limit virus seeding of  
452 tissues.

453

454

#### 455 **Acknowledgements**

456 This work was supported by the Division of Intramural Research, National Institute of Allergy  
457 and Infectious Diseases, National Institutes of Health. Thank you to Stacy Ricklefs and Kimmo  
458 Virtaneva (RML RTB, NIAID) for help with RNA extractions, library preparation and sequencing.  
459 Thank you to Dr. Wade Harper (Harvard Medical School) for providing the PINK1/Parkin HeLa  
460 cell system, Dr. Chengyu Liu (NHLBI Transgenic Core, NIH) for generation of *Ajuba*<sup>-/-</sup> mice, and  
461 Ryan Kissinger (Visual Medical Arts, RML, NIAID) for graphic arts expertise.

462

#### 463 **Author contributions**

464 Conceptualization, S.S.P. and S.M.B; Methodology, S.S.P., S.J.R., K.L.M., F.J., C.S., C.M. and  
465 S.M.B.; Investigation, S.S.P., S.J.R., K.L.M., G.L.S., M.L., F.J., C.K., D.G., A.H., C.S., R.R., G.S., and  
466 C.M.; Resources, C.M.B, G.S., C.M., and S.M.B.; Data curation, S.S.P., S.J.R., K.L.M., G.L.S., M.L.,  
467 F.J., C.K., C.S., G.S., C.M., and S.M.B.; Writing – original draft, S.S.P. and S.M.B; Writing – Review  
468 and Editing, S.S.P., S.J.R., K.L.M., G.L.S., M.L., F.J., and S.M.B.; Visualization, S.S.P. and S.M.B;  
469 Supervision, S.J.R., C.M.B., G.S., C.M. and S.M.B.

470

#### 471 **Declaration of Interests**

472 The authors declare no competing interests.

473

474

475

476

477

#### 478 **METHODS**

479

##### 480 **Cell Culture and generation of Mouse embryonic fibroblasts (MEFs)**

481 HEK293T cells (ATCC; CRL-3216), HEK293 cells (ATCC; CRL-1573), A549 cells (ATCC; CCL-185),  
482 Human hepatoma cell line (Huh7), Vero cells (ATCC; CCL-81), Hela cells (ATCC; CCL-2) and  
483 PINK1/Parkin modified Hela cells (Ordureau et al., 2014), Primary Dermal Fibroblast (ATCC; PCS-  
484 201-012) and murine embryonic fibroblasts (WT MEF), Ajuba<sup>-/-</sup> and PINK1<sup>-/-</sup> MEFs were grown in  
485 Dulbecco's modified enrichment medium (GIBCO; 11995-065) containing 10% fetal bovine serum  
486 (GIBCO; 16000-044) and 1% penicillin/streptomycin (GIBCO; 15140-122) in an atmosphere of 5%  
487 CO<sub>2</sub> at 37°C. For WT, PINK1<sup>-/-</sup> and Ajuba<sup>-/-</sup> MEFs isolation, fifteen-day old mouse embryos were  
488 collected, their separated torsos were washed with PBS, minced, placed in 0.25 % trypsin-EDTA  
489 (Invitrogen) containing 1 µg/ml DNase I (Ambion) and incubated at 37°C for 15 min. Cells were  
490 filtered using a 100 µM nylon strainer, centrifuged (500 x g, 5 min), resuspended in complete  
491 DMEM, plated in tissue culture flasks with designation of passage 1. These cells were used for  
492 experiments between passage 2-5. All cells were counted on an Image Cytometer (Invitrogen).  
493 Cells were either mock infected or infected with SENV (200 Units/well; Charles River  
494 Laboratories), VSV (MOI 0.01) and ZIKV PRABC59 strain (MOI 1). Virus was allowed to adsorb for  
495 1 hour at 37°C followed by a media change and incubation for the indicated time.

496

##### 497 **Plasmids, siRNAs and Transfections**

498 Human Ajuba and LIMD1 genes were PCR amplified from cDNA templates and directionally  
499 cloned into the Gateway entry vector pENTR/SD/D-TOPO (ThermoFisher). Mammalian  
500 expression plasmids were then obtained by recombination into Gateway destination vectors

501 pcDNA6.2/FLAG-DEST, GFP-DEST and RFP-DEST (for N-terminal FLAG tag, N'-GFP tag and N'-RFP  
502 tag). All plasmids were verified by DNA sequencing. Additional plasmids used to express GFP,  
503 MAVS and HA-Ubiquitin were obtained from Addgene (#135046, #52135 and #17608) while  
504 EGFP-Parkin and its mutant was a kind gift from Dr. Wolfdieter Springer (Mayo Clinic, Jacksonville  
505 FL). ZIKV virus NS5 expression plasmids are previously described (Grant et al., 2016). For siRNA  
506 experiments, A549 cells in a 12-well format were transfected with 10 pmol of siRNA (Dharmacon;  
507 SMART pool against AJUBA, LIMD1 mRNA and a nonspecific control sequence) for 48 h using  
508 Lipofectamine RNAiMAX (Life Technologies). Plasmid transfections were performed according to  
509 manufacturer's protocol in 12 -well plates or 4-well Lab Tek II chamber slides (Nunc) using  
510 jetPRIME reagent (VWR INTERNATIONAL; # 89129-924). For harder to transfect Huh7 cells a  
511 spinning method was performed post transfection (Spinfection) that adds centrifugation of  
512 transfected cells at 1000 rpm for 30 minutes at rt.

513

### 514 **Western Blotting**

515 Cells were washed in phosphate buffered saline (PBS) and harvested in 300  $\mu$ l each (for 12 well  
516 plate) and 500  $\mu$ l each (for 6 well plate) in RIPA buffer (50 mM Tris-HCl, 150 mM NaCl, 0.1 % SDS,  
517 1% NP-40, 0.5% Na-deoxycholate and DNase I) with complete protease and phosphatase  
518 inhibitor cocktail (Roche). Cellular debris was removed by centrifugation (10000 x *g* for 10 min at  
519 4°C) and the supernatant was mixed with sample buffer (2X SB, 62.5 mM TRIS pH 6.8, 10%  
520 glycerol, 15 mM EDTA, 4% 2-ME, 2% SDS, and bromophenol blue) and incubated for 10 min at  
521 95°C. An equal amount of sample was resolved by electrophoresis in the presence of SDS on  
522 polyacrylamide gels (ThermoFisher). Proteins were transferred to nitrocellulose/PVDF  
523 membrane using the iBlot Gel Transfer Device (ThermoFisher) or wet transferred using 0.5 M  
524 sodium phosphate transfer buffer (at a constant 1 Amp for an hour using a Bio-Rad apparatus).  
525 Membranes were blocked in 5% milk in PBS-T and probed with primary antibody (overnight at  
526 4°C) followed by an hour incubation with secondary antibody at rt with 3X washes of PBST for 10  
527 minutes after each step of incubation. Membranes were blocked in membrane blocking solution  
528 (ThermoFisher) with 50mM NaF added when phospho-specific antibodies were used.  
529 Immunoreactive proteins were detected by the ECL Plus chemiluminescent system (Thermo  
530 Fisher). Western blots were scanned using FluorChem E system (Protein Simple) and  
531 quantification of immunoblot bands was performed using ImageJ software.

532

### 533 **Antibodies**

534 The following primary antibodies were used: mouse anti FLAG (#F1804-200UG, Sigma), rabbit  
535 anti FLAG tag (#8146S and #14793S, Cell Signaling Technology), mouse anti HA tag (#901502,  
536 Biolegend), rabbit anti HA tag (#3724S, Cell Signaling Technology), mouse anti GFP (#632381,  
537 Takara Bio Clontech), mouse anti Vinculin (#V9131-100UL, MilliporeSigma), mouse anti GAPDH  
538 (#sc-47724, Santa Cruz), mouse anti Ajuba (#sc-374610, Santa Cruz), rabbit anti Ajuba (#34648S  
539 and #4897S, Cell Signaling Technology), rabbit anti p-Ubiquitin Ser65 (#ABS1513-I, EMD  
540 Millipore), rabbit anti p-Ubiquitin Ser65 (#37642S, Cell Signaling Technology), mouse anti  
541 Mitofusin-2 (#sc-100560, Santa Cruz), rabbit anti Mitofusin-1 (#sc-50330, Santa Cruz), rabbit anti  
542 Mitofusin-1 (#14739S, Cell Signaling Technology), mouse anti MAVS (#ENZ-ABS259-0100, Enzo),  
543 rabbit anti TIM44 (#ab24466, Abcam), rabbit anti-TOMM20 (#HPA011562, Sigma), rabbit anti  
544 Calreticulin (#JM-3077-100, MBL international Corporation), rabbit anti PINK1 (#ab23707,



545 Abcam), mouse anti PINK1 (#sc-517353, Santa Cruz), sheep anti p-PINK1 Thr-257 (#68-0057-100,  
546 Ubiquigent), mouse anti Parkin (#sc-32282, Santa Cruz), rabbit anti Parkin (#2132S, Cell Signaling  
547 Technology), rabbit anti PKR (#ab184257, Abcam), rabbit anti p-PKR Thr-451 (#07-886, EMD-  
548 Millipore), rabbit anti eIF2a (#9722S, Cell Signaling Technology), rabbit anti p-eIF2a S51 (#9721S,  
549 Cell Signaling Technology), rabbit anti ATF4 (#11815S, Cell Signaling Technology), dsRNA antibody  
550 J2 (#10010200, English& Scientific Consulting), mouse anti ZIKV Envelope (#BF-1176-56, BioFront  
551 Technologies) and chicken antibody to SENV (#ab33988, Abcam). Mouse isotype IgG control (#sc-  
552 2025, Santa Cruz) and rabbit isotype IgG control (#sc-2027, Santa Cruz) was used as a control for  
553 immunoprecipitation. Following secondary antibodies were used: HRP conjugated goat anti-  
554 mouse antibody (#P0447, Dako from Agilent), HRP conjugated goat anti-rabbit antibody (#P0448,  
555 Dako from Agilent), anti-chicken antibodies (#12-341, Millipore) and anti-sheep HRP Secondary  
556 antibody (#ab97125, Abcam).

557

### 558 **Inhibitors**

559 Cell culture grade proteasomal inhibitors epoxomicin (Sigma; #E3652) and lysosomal inhibitor  
560 bafilomycin A1 (Baf-A1) (Sigma; #B1793) was used at concentration of 200nM each. Oxidative  
561 stress inducers tunicamycin (Sigma; # SML1287) and oligomycin A (Sigma; # 75351) were used at  
562 5µg/ml for 5 h in incomplete media. Mitochondrial depolarizing agent carbonyl cyanide 3-  
563 chlorophenylhydrazone, CCCP (Millipore Sigma; #C2759) was used at 10µM. Integrated stress  
564 response inhibitors ISRIB (Sigma; #SML0843), PKR inhibitor C16 (Millipore Sigma; #527450) and  
565 a PKR Inhibitor negative control (Millipore Sigma; #527455) were used at 500nM for 24 h prior to  
566 the time of harvest. Ethidium bromide solution (Sigma; #E1385) was used at 100ng/ml.

567

### 568 **Generation of Knockout Mice**

569 *Ajuba* knockout mice (*Ajuba*<sup>-/-</sup>) were generated using CRISPR/Cas9 technology. Briefly, in vitro  
570 synthesized guide RNA (sgRNAs) that were designed to cut shortly after the translation initiation  
571 codon in *Ajuba* Exon 1 were ordered from ThermoFisher's sgRNA service  
572 (CCGGAGTCCGAGAGTCTCAACTT). sgRNA (20ng/ul) was microinjected with Cas9 mRNA (50ng/ug  
573 purchased from TriLink BioTechnologies) into the cytoplasm of fertilized eggs collected from  
574 C57BL/6N mice (Charles River Laboratory). The injected embryos were cultured overnight in M16  
575 medium, and those that reached 2-cell stage of development were implanted into the oviducts  
576 of pseudopregnant foster mothers (CD-1 mice from Charles River Laboratory). Offspring born to  
577 the foster mothers were genotyped by PCR and sanger sequencing. Founder mice with desired  
578 mutations were bred with C57BL/6N mice to establish the knockout mouse line. The two lines  
579 #1 (with 4 nt deletion) and #2 (with 22 nt deletion in exon 1) were designated as *Ajuba*<sup>-/-</sup> 8216A  
580 and *Ajuba*<sup>-/-</sup> 8258B respectively. The PINK1 knockout mice (*PINK1*<sup>-/-</sup>) were procured from Jackson  
581 Laboratory.

582

### 583 **Mouse experiments**

584 All animal experiments were approved by the IACUC of Rocky Mountain Laboratories, National  
585 Institutes of Health and carried out by a certified staff in an Association for Assessment and  
586 Accreditation of Laboratory Animal Care International accredited facility, according to the  
587 institution's guidelines for animal use, and followed the guidelines and basic principles in the U.S.  
588 Public Health Service Policy on Humane Care and Use of Laboratory Animals and the Guide for

589 the Care and Use of Laboratory Animals. Male and female mice (4-5 weeks old) were treated by  
590 intraperitoneal injection with 2 mg of an anti-mouse IFNAR1 blocking antibody (MAR1-5A3, from  
591 Leinco Technologies). The next day, mice were inoculated subcutaneously (via footpad) with  $10^3$   
592 PFU of mouse-adapted ZIKV-Dak-41525 (Gorman et al., 2018) kindly provided by Dr. Michael  
593 Diamond (University of Washington School of Medicine in Saint Louis). Tissue and blood samples  
594 were collected on day 3 and 5 post infection.

595

#### 596 **RNA Isolation and quantitative RT-PCR**

597 Total RNA was isolated from cells using RNeasy kit with genomic DNA elimination (QIAGEN). RNA  
598 was reverse transcribed using a SuperScript VILO cDNA synthesis kit (ThermoFisher) according to  
599 manufacturer's protocol. cDNA was then used as a template in TaqMan-PCR reactions per  
600 manufacturer's instructions (Applied Biosystems) to quantify mRNA specific for IFN $\beta$  (assay ID:  
601 Hs01077958\_s1), housekeeping gene HPRT (assay ID: Hs01003267\_m1), Ajuba (assay ID:  
602 Hs00262750\_m1) and LIMD1 (assay ID: Hs01040528\_m1). Reactions for Real-time RT-PCR were  
603 set up in triplicate, cycled and data was collected on the Applied Biosystems GeneAmp 9500  
604 Sequence detection system. Gene expression was normalized to HPRT mRNA levels and  
605 expressed as fold change relative to RNA samples from control cells using the comparative  $\Delta$ CT  
606 method.

607

#### 608 **Plaque assay**

609 Viral titers from supernatants collected from cells infected with VSV or ZIKV were determined by  
610 plaque assay. Briefly, 24 hr prior to titrations, 24-well plates were seeded with  $2 \times 10^5$  Vero cells  
611 per well. Viral samples were 10-fold serially diluted in completed DMEM ranging from  $10^{-1}$  to  $10^{-8}$   
612 and 125  $\mu$ l of dilution was added to individual wells. After the plates were incubated for 1h of  
613 virus adsorption, the inoculum was removed, and the cells were overlaid with Minimum Essential  
614 Medium containing 1.5% carboxymethylcellulose (w/v). The plates were incubated at 37°C for 4  
615 days and were then fixed with 10% formaldehyde for 1 hr at rt followed by staining with 1%  
616 crystal violet (in 25% ethanol) for 10 min. Excessive crystal violet and residual overlay media was  
617 washed with water and visible plaques were counted to calculate viral titers as plaque forming  
618 units per ml (PFU/ml). For analysis of viral distribution in tissues, mice were euthanized at 3 and  
619 5 dpi, and indicated tissues were collected. Organs were individually weighed, homogenized, and  
620 prepared as 10% (w/v) suspensions in DMEM/2% FBS/Pen/Strep. Suspensions were then clarified  
621 by centrifugation (4,000 rpm for 5 min at 4°C), and the supernatants were titrated using plaque  
622 assay.

623

#### 624 **Confocal Microscopy**

625 80,000 cells were seeded onto each well of 4 well Lab-Tek II chamber slides (Thermo Fisher  
626 Scientific) overnight. To fix, cells were washed with PBS and subsequently fixed with 4%  
627 paraformaldehyde for 10 min. Cells were permeabilized with 0.1% Triton X-100 for 5 min at RT,  
628 and incubated with blocking solution (PBS, 0.5% BSA, 1% goat serum) for an additional 30 min.  
629 Cells were then incubated with primary antibody overnight at 4°C (or 2 hours at RT), washed  
630 three times with PBS and further incubated with secondary antibody (in blocking buffer)  
631 conjugated to Alexa 488, 594 or 647 (Thermo Fisher Scientific) for 1 h. Slides were washed three  
632 times with PBS and once with milliQ water, and mounted onto glass coverslips using Prolong Gold



633 Antifade Reagent with DAPI (Invitrogen). Processed slides were imaged using a Zeiss LSM710  
634 confocal microscope and further analyzed using Zen software (Carl Zeiss).

635

### 636 **Mitochondrial Fractionation**

637 Mitochondria Isolation Kit for Cultured Cells (Thermo Fisher Scientific; # 89874) was used for  
638 mitochondrial fractionation using the manufacturer's protocol. In short, around  $2 \times 10^7$  cells were  
639 pelleted by centrifugation in a 2.0mL microcentrifuge tube at  $850 \times g$  for 2 minutes. Supernatant  
640 was discarded and 800  $\mu$ L of Mitochondria Isolation Reagent A (with proteasomal inhibitor) was  
641 added. Cells were vortexed at medium speed for 5 seconds and incubated on ice for exactly 2  
642 minutes. 10  $\mu$ L of Mitochondria Isolation Reagent B was added and sample was vortexed at  
643 maximum speed for 5 seconds followed by an incubation on ice for 5 min with an in between  
644 vortexing step at maximum speed every minute. 800  $\mu$ L of Mitochondria Isolation Reagent C  
645 (with proteasomal inhibitor) was added and the sample tube was inverted several time to mix  
646 properly. The sample was centrifuged at  $700 \times g$  for 10 minutes at  $4^\circ\text{C}$  and the supernatant was  
647 transferred to a new 2.0 ml tube, followed by another centrifugation step at  $12,000 \times g$  for 15 min  
648 at  $4^\circ\text{C}$ . The pellet contains the isolated mitochondria and supernatant is cytosolic fraction.  
649 Mitochondrial pellet was given an additional wash using 500  $\mu$ L of Mitochondria Isolation  
650 Reagent C and centrifugation step at  $12,000 \times g$  for 5 minutes. The pellet was dissolved directly  
651 in 60  $\mu$ L of lamelli buffer for western blotting as a downstream application and meanwhile stored  
652 in  $-20^\circ\text{C}$ .

653

### 654 **Extracellular Flux (Seahorse) Analysis.**

655 MEF isolated from WT, PINK1<sup>-/-</sup>, or and AJUBA<sup>-/-</sup> mice were seeded at  $2 \times 10^4$  cells per well in a  
656 XFe96 tissue culture plate and incubated for 24 hours in cDMEM. Cells were washed 2 times with  
657 200  $\mu$ L of extracellular flux assay medium (DMEM with 25 mM glucose, 2 mM sodium pyruvate,  
658 and 2 mM L-glutamine for mitochondrial stress test (Agilent Technologies). Assay medium was  
659 then added to each well to make the final well volume 180  $\mu$ L. Cells were incubated for 1 hr at  
660  $37^\circ\text{C}$  in a non-CO<sub>2</sub> incubator prior to extracellular flux analysis. Oxygen consumption rate (OCR)  
661 rate was measured using the Mito Stress Test according to manufactures instructions. Briefly,  
662 mitochondrial stress assessment included analysis of basal OCR and OCR following injection of  
663 oligomycin (2  $\mu$ M, MilliporeSigma), fluoro-carbonyl cyanide phenylhydrazone (FCCP; 2  $\mu$ M;  
664 Cayman Chemical), and rotenone/antimycin (0.5  $\mu$ M final concentration for both;  
665 MilliporeSigma). All extracellular flux assays were performed on the Seahorse XFe96 Analyzer  
666 (Agilent Technologies).

667

### 668 **Flow cytometry**

669 Cells were harvested after 16 hours of treatment conditions, and 30 minutes of mitotracker  
670 staining (200nM)(Sprung et al., 2018) followed by staining with LIVE/DEAD Fixable Aqua Dead  
671 Cell Stain Kit (ThermoFisher). Data was acquired on a LSRII flow cytometer (BD Biosciences) and  
672 analyzed using FlowJo software and are representative of four independent experiments  
673 performed. Dead cells, debris and doublets were excluded from all analyses.

674

### 675 **Protein Purification (By GeneScript)**

676 Ajuba and PINK1 DNA sequence was codon optimized and synthesized to be cloned into pET30a  
677 vector with N terminal His tag for protein expression in *E. coli*. Transformed *E. coli* strain  
678 BL21(DE3) was inoculated into TB medium containing kanamycin and cultured at 37 °C. When  
679 the OD600 reached about 1.2, cell culture was induced with IPTG at 15°C for 16 h. Cells were  
680 harvested by centrifugation. Cell pellets were resuspended with lysis buffer followed by  
681 sonication. The inclusion bodies after centrifugation were dissolved using urea. Target protein  
682 from denatured supernatant were refolded and sterilized by 0.22µm filter. Protein concentration  
683 was determined by Bradford protein assay with BSA as standard. The protein purity and  
684 molecular weight were determined by standard SDS-PAGE along with western blot confirmation.

685

#### 686 **Co-immunoprecipitation assay (co-IP)**

687 Cells were washed with PBS and lysed in RIPA buffer (supplemented with 5µg/ml DNase I and  
688 protease inhibitor cocktail). Samples were subjected to centrifugation for 10 min to remove  
689 cellular debris and 100 µL of supernatant was reserved for input analysis. Cell lysates were then  
690 pre-cleared by addition of Dynabeads Protein G (ThermoFisher) and rotated at 4°C for 3 h. Beads  
691 were removed by centrifugation, and 2 µg antibody (corresponding to the protein of interest/  
692 protein tag) was added to each lysate for 2 h with rotation at 4°C. 50 µL of Dynabeads Protein G  
693 were added again, and lysates were incubated with rotation at 4°C overnight. Lysates were  
694 discarded after a brief centrifugation, and beads were washed 3 times in RIPA buffer for 15 min  
695 (at 4°C with rotation) prior to elution by incubation at 95°C for 10 minutes in 50 µL of 2X sample  
696 buffer. The eluted samples were assayed by immunoblotting as described above. IP with *E.coli*  
697 purified PINK1 and Ajuba used 250nM of each protein in PBS followed by the regular protocol  
698 past the pre-clear step.

699

#### 700 ***In-vitro* PINK1 phosphorylation assay**

701 Kinase assay was performed using recombinant proteins purified from *E.coli* and commercially  
702 available 10X Kinase buffer (Cell Signaling Technology, #9802). Recombinant proteins (N'-His  
703 PINK1 and N'-His Ajuba) were thawed on ice. In a clean microtube, 500 µM ATP in kinase assay  
704 buffer diluted in milliQ water to a final concentration of 1× and PINK1 (300 nM) was mixed with  
705 Ajuba, the concentration of which was adjusted by dilution from 50 nM to 300 nM for each  
706 separate kinase reaction in 25 µl total reaction volume. All reaction mixtures were normalized  
707 with BSA to have 1µg total protein in each condition. Negative controls were prepared using as  
708 above with either minus Ajuba or minus PINK1. Reactions were spin down for 10 sec at 1,000 × *g*  
709 at 4 °C and then were incubated in heated shaker at 30 °C for 30 minutes. The reaction was  
710 stopped by boiling for 5 min at 95 °C in 6× SDS loading buffer and were separated by SDS-PAGE  
711 electrophoresis (16% gel). Detection of PINK1 auto phosphorylation was assessed using phospho-  
712 specific antibody on a western blot.

713

#### 714 **Bio-plex Cytokine Analysis**

715 Sera were collected from mock- and ZIKV-infected mice at 3 and 5 dpi. Primary human dermal  
716 fibroblast culture supernatants were collected at the indicated time points after ZIKV infection  
717 and Control/C16/ISRIB treatment. Cytokine concentrations in serum were measured using a  
718 mouse 23-cytokine Bio-Plex Pro Assay according to the manufacturer's instructions (BioRad).  
719 Concentrations for human cytokines were determined using the ProcartaPlex Multiplex

720 Immunoassay (Thermo Fisher Scientific). Briefly, samples were incubated with magnetic beads  
721 coupled to cytokine-specific antibodies for 2 h at rt. Beads were washed, incubated with biotin-  
722 labeled secondary antibodies for 30 min, washed again and then incubated with a streptavidin  
723 reporter for 30 min. After another round of washing, resuspended beads were read by Luminex  
724 200 Bio-Plex Array Reader (Bio-Rad) to acquire data (Internal bead fluorescence, indicative of  
725 each distinct cytokine, and fluorescence intensity of signal).

726

### 727 **Electron Microscopy**

728 Cells were grown on Thermanox coverslips and fixed with 2.5% glutaraldehyde in 0.1 M sodium  
729 cacodylate buffer. Samples were processed in a PELCO BioWave laboratory microwave (Ted Pella,  
730 Reading, California) by post-fixation with 0.5% osmium tetroxide + 0.8% potassium ferrocyanide  
731 in 0.1 M sodium cacodylate buffer, buffer rinse, 1% aqueous tannic acid, water rinse, 1% aqueous  
732 samarium acetate, water rinse, dehydration into ethanol, embedment into epon, and  
733 polymerization overnight at 60°C. Thin sections were cut with a Leica UC6 ultramicrotome (Leica  
734 Microsystems, Vienna, Austria), stained with uranyl acetate, and imaged on either a 120 kV  
735 HT7800 (Hitachi) operating at 80 kV with an XR-81B CMOS digital camera (AMT Imaging System,  
736 Woburn, Massachusetts) or on a 120 kV Tecnai Bio Twin Spirit (FEI, Hillsboro, Oregon) with a  
737 Rio CMOS digital camera (Gatan, Pleasanton, California).

738

### 739 **NGS Library Preparation**

740 Cells were harvested in Trizol and frozen on dry ice. Each sample lysate was combined with  
741 additional Trizol to bring the final volume to 1000 $\mu$ l in each sample, 200 $\mu$ l of 1-Bromo-3-  
742 chloropropane (MilliporeSigma) was added, samples mixed, and centrifuged at 16,000 x *g* for 15  
743 min at 4°C. RNA containing aqueous phase of 600 $\mu$ l was collected from each sample and passed  
744 through Qias shredder column (Qiagen) at 21,000 x *g* for 2 min to homogenize any remaining  
745 genomic DNA in the aqueous phase. Aqueous phase was combined with 600 $\mu$ l of RLT lysis buffer  
746 (Qiagen) with 1%  $\beta$  mercaptoethanol and RNA was extracted using Qiagen AllPrep DNA/RNA 96-  
747 well system. An additional on-column Dnase I treatment was performed during RNA extraction.  
748 Standard RNeasy extraction protocol resulted in RNAs larger than 200nt. All sample processing  
749 was performed using amplicon-free reagents and tools in aerosol resistant vials. RNA was  
750 quantitated by spectrophotometry and RNA yield ranged from 0.6 to 8.5 $\mu$ g. RNA quality was  
751 analyzed using Agilent 2100 Bioanalyzer (Agilent Technologies) and RNA integrity number (RIN)  
752 ranged from 7.6 to 9.9 (showing an overall exceptional RNA quality). 500 ng RNA was used as  
753 input for the TruSeq Stranded mRNA-Seq Sample Preparation Kit (Illumina). The protocol was  
754 followed without modification. Final library size distribution was assessed on a BioAnalyzer DNA  
755 1000 chip (Agilent Technologies). The average size of the libraries was on target at around 310  
756 bp. Libraries were quantified using the Kapa SYBR FAST Universal qPCR kit for Illumina sequencing  
757 on the CFX384 Real-Time PCR Detection System (Bio-Rad Laboratories). The libraries were diluted  
758 to 4 nM stocks and pooled equitably for sequencing. The 4 nM pool of libraries was prepared for  
759 sequencing by denaturing and diluting to a 1.8 pM stock for clustering to the flow cell. On-board  
760 cluster generation and paired-end sequencing was completed on the NextSeq 550 (Illumina) using  
761 a High Output 150 cycle kit (Illumina). The average cluster density was 177 k/mm<sup>2</sup> resulting in  
762 420 million reads passing filter per run, with an average of 22.6 million reads per sample. Raw  
763 fastq reads were trimmed of Illumina adapter sequences using cutadapt version 1.12 and then

764 trimmed and filtered for quality using the FASTX-Toolkit (Hannon Lab). Remaining reads were  
765 aligned to the mouse genome assembly mm10 using Hisat2. Reads mapping to genes were  
766 counted using htseq-count.

767

### 768 **Bioinformatic analysis**

769 Briefly, differential expression analysis in heatmaps was performed using the Bioconductor  
770 package DESeq2. Cytokine analysis for RNA seq data involves 157 genes mapped on the KEGG  
771 pathway mmu04060. Volcano plots were created to identify cytokine genes showing more than  
772 2 log<sub>2</sub> fold change with corresponding significant P values in control versus infected samples.  
773 Functional and network analysis of statistically significant gene expression changes was  
774 performed using Ingenuity Pathways Analysis (IPA, QIAGEN). Significant canonical pathways are  
775 identified from IPA based on enrichment of the zscore.

776

### 777 **Mass spectrometry (By MS Bioworks)**

778 Samples were processed by SDS-PAGE using a 4-12% Bis-Tris NuPAGE gel (Invitrogen) with the  
779 MOPS buffer system. The target bands were excised and processed by in-gel digestion using a  
780 robot (ProGest, DigiLab). The digest was analyzed by nano LC-MS/MS with a Waters NanoAcquity  
781 HPLC system interfaced to a ThermoFisher Q Exactive. Peptides were loaded on a trapping  
782 column and eluted over a 75µm analytical column at 350nL/min; both columns were packed with  
783 Luna C18 resin (Phenomenex). The mass spectrometer was operated in data-dependent mode,  
784 with the Orbitrap operating at 60,000 FWHM and 17,500 FWHM for MS and MS/MS respectively.  
785 The fifteen most abundant ions were selected for MS/MS. Samples were analyzed in analytical  
786 duplicate. Data were searched using a local copy of Mascot (Matrix Science) and Mascot DAT files  
787 were parsed into Scaffold (Proteome Software) for validation, filtering and to create a non-  
788 redundant list per sample. Data were filtered using a minimum protein value of 99.9%, a  
789 minimum peptide value of 50% (Prophet scores) and requiring at least two unique peptides per  
790 protein. Scaffold results were exported as mzidentML and imported in to Scaffold PTM in order  
791 to assign site localization probabilities using A-score with minimum localization probability filter  
792 of 50%.

793

### 794 **RNA scope in-situ Hybridization**

795 In situ hybridization was performed using the RNAScope 2.5 VS assay (Advanced Cell Diagnostics,  
796 Newark, CA) according to the manufacturer's instructions using a mouse Ajuba specific probe  
797 (cat#579019).

798

### 799 **Statistical Analysis.**

800 All data were evaluated for significance using student T-tests, Mann Whitney test, or one-  
801 way/two-way ANOVA with appropriate multiple comparison post tests using GraphPad Prism 7  
802 software. Statistical significance was assigned as when *p* values were <0.05. Specifically, \**p*<0.05,  
803 \*\**p*<0.01, \*\*\**p*<0.001, \*\*\*\**p*<0.0001, not significant (NS) when *p* > 0.5.

804

### 805 **References for Methods:**

- 806 Gorman, M.J., Caine, E.A., Zaitsev, K., Begley, M.C., Weger-Lucarelli, J., Uccellini, M.B., Tripathi,  
807 S., Morrison, J., Yount, B.L., Dinnon, K.H., 3rd, *et al.* (2018). An Immunocompetent Mouse  
808 Model of Zika Virus Infection. *Cell Host Microbe* **23**, 672-685 e676.  
809
- 810 Grant, A., Ponia, S.S., Tripathi, S., Balasubramaniam, V., Miorin, L., Sourisseau, M., Schwarz,  
811 M.C., Sanchez-Seco, M.P., Evans, M.J., Best, S.M., *et al.* (2016). Zika Virus Targets Human STAT2  
812 to Inhibit Type I Interferon Signaling. *Cell Host Microbe* **19**, 882-890.  
813
- 814 Ordureau, A., Sarraf, S.A., Duda, D.M., Heo, J.M., Jedrychowski, M.P., Sviderskiy, V.O.,  
815 Olszewski, J.L., Koerber, J.T., Xie, T., Beausoleil, S.A., *et al.* (2014). Quantitative proteomics  
816 reveal a feedforward mechanism for mitochondrial PARKIN translocation and ubiquitin chain  
817 synthesis. *Mol Cell* **56**, 360-375.  
818
- 819 Sprung, M., Dikic, I., and Novak, I. (2018). Flow Cytometer Monitoring of Bnip3- and Bnip3L/Nix-  
820 Dependent Mitophagy. *Methods Mol Biol* **1759**, 105-110.  
821  
822  
823  
824  
825
- 826 **References for Main Text:**
- 827 Aguirre, S., Luthra, P., Sanchez-Aparicio, M.T., Maestre, A.M., Patel, J., Lamothe, F., Fredericks,  
828 A.C., Tripathi, S., Zhu, T., Pintado-Silva, J., *et al.* (2017). Dengue virus NS2B protein targets cGAS  
829 for degradation and prevents mitochondrial DNA sensing during infection. *Nat Microbiol* **2**,  
830 17037.  
831
- 832 Aguirre, S., Maestre, A.M., Pagni, S., Patel, J.R., Savage, T., Gutman, D., Maringer, K., Bernal-  
833 Rubio, D., Shabman, R.S., Simon, V., *et al.* (2012). DENV inhibits type I IFN production in infected  
834 cells by cleaving human STING. *PLoS Pathog* **8**, e1002934.  
835
- 836 Ambrose, R.L., and Mackenzie, J.M. (2011). West Nile virus differentially modulates the  
837 unfolded protein response to facilitate replication and immune evasion. *J Virol* **85**, 2723-2732.  
838
- 839 Ambrose, R.L., and Mackenzie, J.M. (2013). ATF6 signaling is required for efficient West Nile  
840 virus replication by promoting cell survival and inhibition of innate immune responses. *J Virol*  
841 **87**, 2206-2214.  
842
- 843 Archer, S.L. (2013). Mitochondrial dynamics--mitochondrial fission and fusion in human  
844 diseases. *N Engl J Med* **369**, 2236-2251.  
845



- 846 Ayala-Nunez, N.V., Follain, G., Delalande, F., Hirschler, A., Partiot, E., Hale, G.L., Bollweg, B.C.,  
847 Roels, J., Chazal, M., Bakoa, F., *et al.* (2019). Zika virus enhances monocyte adhesion and  
848 transmigration favoring viral dissemination to neural cells. *Nat Commun* *10*, 4430.  
849
- 850 Ayala-Nunez, N.V., and Gaudin, R. (2020). A viral journey to the brain: Current considerations  
851 and future developments. *PLoS Pathog* *16*, e1008434.  
852
- 853 Best, S.M. (2017). The Many Faces of the Flavivirus NS5 Protein in Antagonism of Type I  
854 Interferon Signaling. *J Virol* *91*, e01970-16.  
855
- 856 Chatel-Chaix, L., Cortese, M., Romero-Brey, I., Bender, S., Neufeldt, C.J., Fischl, W., Scaturro, P.,  
857 Schieber, N., Schwab, Y., Fischer, B., *et al.* (2016). Dengue Virus Perturbs Mitochondrial  
858 Morphodynamics to Dampen Innate Immune Responses. *Cell Host Microbe* *20*, 342-356.  
859
- 860 Chen, Q., Gouilly, J., Ferrat, Y.J., Espino, A., Glaziou, Q., Cartron, G., El Costa, H., Al-Daccak, R.,  
861 and Jabrane-Ferrat, N. (2020). Metabolic reprogramming by Zika virus provokes inflammation in  
862 human placenta. *Nat Commun* *11*, 2967.  
863
- 864 Chen, X., Stauffer, S., Chen, Y., and Dong, J. (2016). Ajuba Phosphorylation by CDK1 Promotes  
865 Cell Proliferation and Tumorigenesis. *J Biol Chem* *291*, 14761-14772.  
866
- 867 Dhir, A., Dhir, S., Borowski, L.S., Jimenez, L., Teitell, M., Rotig, A., Crow, Y.J., Rice, G.I., Duffy, D.,  
868 Tamby, C., *et al.* (2018). Mitochondrial double-stranded RNA triggers antiviral signalling in  
869 humans. *Nature* *560*, 238-242.  
870
- 871 Dodson, C.A., and Bayliss, R. (2012). Activation of Aurora-A kinase by protein partner binding  
872 and phosphorylation are independent and synergistic. *J Biol Chem* *287*, 1150-1157.  
873
- 874 Fang, E.F., Hou, Y., Palikaras, K., Adriaanse, B.A., Kerr, J.S., Yang, B., Lautrup, S., Hasan-Olive,  
875 M.M., Caponio, D., Dan, X., *et al.* (2019). Mitophagy inhibits amyloid-beta and tau pathology  
876 and reverses cognitive deficits in models of Alzheimer's disease. *Nat Neurosci* *22*, 401-412.  
877
- 878 Foo, S.S., Chen, W., Chan, Y., Lee, W.S., Lee, S.A., Cheng, G., Nielsen-Saines, K., Brasil, P., and  
879 Jung, J.U. (2018). Biomarkers and immunoprofiles associated with fetal abnormalities of ZIKV-  
880 positive pregnancies. *JCI Insight* *3*, e124152.  
881
- 882 Fujimaki, M., Saiki, S., Sasazawa, Y., Ishikawa, K.I., Imamichi, Y., Sumiyoshi, K., and Hattori, N.  
883 (2018). Immunocytochemical Monitoring of PINK1/Parkin-Mediated Mitophagy in Cultured  
884 Cells. *Methods Mol Biol* *1759*, 19-27.  
885
- 886 Gal-Ben-Ari, S., Barrera, I., Ehrlich, M., and Rosenblum, K. (2018). PKR: A Kinase to Remember.  
887 *Front Mol Neurosci* *11*, 480.  
888

- 889 Gilfoy, F.D., and Mason, P.W. (2007). West Nile virus-induced interferon production is mediated  
890 by the double-stranded RNA-dependent protein kinase PKR. *J Virol* *81*, 11148-11158.  
891
- 892 Gorman, M.J., Caine, E.A., Zaitsev, K., Begley, M.C., Weger-Lucarelli, J., Uccellini, M.B., Tripathi,  
893 S., Morrison, J., Yount, B.L., Dinnon, K.H., 3rd, *et al.* (2018). An Immunocompetent Mouse  
894 Model of Zika Virus Infection. *Cell Host Microbe* *23*, 672-685 e676.  
895
- 896 Grant, A., Ponia, S.S., Tripathi, S., Balasubramaniam, V., Miorin, L., Sourisseau, M., Schwarz,  
897 M.C., Sanchez-Seco, M.P., Evans, M.J., Best, S.M., *et al.* (2016). Zika Virus Targets Human STAT2  
898 to Inhibit Type I Interferon Signaling. *Cell Host Microbe* *19*, 882-890.  
899
- 900 Harper, J.W., Ordureau, A., and Heo, J.M. (2018). Building and decoding ubiquitin chains for  
901 mitophagy. *Nat Rev Mol Cell Biol* *19*, 93-108.  
902
- 903 He, X., Zhu, Y., Zhang, Y., Geng, Y., Gong, J., Geng, J., Zhang, P., Zhang, X., Liu, N., Peng, Y., *et al.*  
904 (2019). RNF34 functions in immunity and selective mitophagy by targeting MAVS for autophagic  
905 degradation. *EMBO J* *38*, e100978.  
906
- 907 Heo, J.M., Ordureau, A., Paulo, J.A., Rinehart, J., and Harper, J.W. (2015). The PINK1-PARKIN  
908 Mitochondrial Ubiquitylation Pathway Drives a Program of OPTN/NDP52 Recruitment and TBK1  
909 Activation to Promote Mitophagy. *Mol Cell* *60*, 7-20.  
910
- 911 Hirota, T., Kunitoku, N., Sasayama, T., Marumoto, T., Zhang, D., Nitta, M., Hatakeyama, K., and  
912 Saya, H. (2003). Aurora-A and an interacting activator, the LIM protein Ajuba, are required for  
913 mitotic commitment in human cells. *Cell* *114*, 585-598.  
914
- 915 Hou, S., Kumar, A., Xu, Z., Airo, A.M., Stryapunina, I., Wong, C.P., Branton, W., Tchesnokov, E.,  
916 Gotte, M., Power, C., *et al.* (2017). Zika Virus Hijacks Stress Granule Proteins and Modulates the  
917 Host Stress Response. *J Virol* *91*, e00474-17.  
918
- 919 Jia, H., Peng, H., and Hou, Z. (2020). Ajuba: An emerging signal transducer in oncogenesis.  
920 *Pharmacol Res* *151*, 104546.  
921
- 922 Kam, Y.W., Leite, J.A., Lum, F.M., Tan, J.J.L., Lee, B., Judice, C.C., Teixeira, D.A.T., Andreatta-  
923 Santos, R., Vinolo, M.A., Angerami, R., *et al.* (2017). Specific Biomarkers Associated With  
924 Neurological Complications and Congenital Central Nervous System Abnormalities From Zika  
925 Virus-Infected Patients in Brazil. *J Infect Dis* *216*, 172-181.  
926
- 927 Kashatus, D.F., Lim, K.H., Brady, D.C., Pershing, N.L., Cox, A.D., and Counter, C.M. (2011). RALA  
928 and RALBP1 regulate mitochondrial fission at mitosis. *Nat Cell Biol* *13*, 1108-1115.  
929
- 930 Khaminets, A., Heinrich, T., Mari, M., Grumati, P., Huebner, A.K., Akutsu, M., Liebmann, L.,  
931 Stolz, A., Nietzsche, S., Koch, N., *et al.* (2015). Regulation of endoplasmic reticulum turnover by  
932 selective autophagy. *Nature* *522*, 354-358.

933  
934 Kim, Y., Park, J., Kim, S., Kim, M., Kang, M.G., Kwak, C., Kang, M., Kim, B., Rhee, H.W., and Kim,  
935 V.N. (2018). PKR Senses Nuclear and Mitochondrial Signals by Interacting with Endogenous  
936 Double-Stranded RNAs. *Mol Cell* *71*, 1051-1063 e1056.  
937  
938 McEwen, E., Kedersha, N., Song, B., Scheuner, D., Gilks, N., Han, A., Chen, J.J., Anderson, P., and  
939 Kaufman, R.J. (2005). Heme-regulated inhibitor kinase-mediated phosphorylation of eukaryotic  
940 translation initiation factor 2 inhibits translation, induces stress granule formation, and  
941 mediates survival upon arsenite exposure. *J Biol Chem* *280*, 16925-16933.  
942  
943 Melchjorsen, J., Sorensen, L.N., and Paludan, S.R. (2003). Expression and function of  
944 chemokines during viral infections: from molecular mechanisms to in vivo function. *J Leukoc*  
945 *Biol* *74*, 331-343.  
946  
947 Michlmayr, D., Andrade, P., Gonzalez, K., Balmaseda, A., and Harris, E. (2017). CD14(+)CD16(+)  
948 monocytes are the main target of Zika virus infection in peripheral blood mononuclear cells in a  
949 paediatric study in Nicaragua. *Nat Microbiol* *2*, 1462-1470.  
950  
951 Michlmayr, D., Kim, E.Y., Rahman, A.H., Raghunathan, R., Kim-Schulze, S., Che, Y., Kalayci, S.,  
952 Gumus, Z.H., Kuan, G., Balmaseda, A., *et al.* (2020). Comprehensive Immunoprofiling of  
953 Pediatric Zika Reveals Key Role for Monocytes in the Acute Phase and No Effect of Prior Dengue  
954 Virus Infection. *Cell Rep* *31*, 107569.  
955  
956 Mills, E.L., Kelly, B., and O'Neill, L.A.J. (2017). Mitochondria are the powerhouses of immunity.  
957 *Nat Immunol* *18*, 488-498.  
958  
959 Miner, J.J., and Diamond, M.S. (2016). Mechanisms of restriction of viral neuroinvasion at the  
960 blood-brain barrier. *Curr Opin Immunol* *38*, 18-23.  
961  
962 Moehlman, A.T., and Youle, R.J. (2020). Mitochondrial Quality Control and Restraining Innate  
963 Immunity. *Annu Rev Cell Dev Biol* *36*, 265-289.  
964  
965 Mottis, A., Herzig, S., and Auwerx, J. (2019). Mitocellular communication: Shaping health and  
966 disease. *Science* *366*, 827-832.  
967  
968 Naveca, F.G., Pontes, G.S., Chang, A.Y., Silva, G., Nascimento, V.A.D., Monteiro, D., Silva, M.S.D.,  
969 Abdalla, L.F., Santos, J.H.A., Almeida, T.A.P., *et al.* (2018). Analysis of the immunological  
970 biomarker profile during acute Zika virus infection reveals the overexpression of CXCL10, a  
971 chemokine linked to neuronal damage. *Mem Inst Oswaldo Cruz* *113*, e170542.  
972  
973 Ordureau, A., Sarraf, S.A., Duda, D.M., Heo, J.M., Jedrychowski, M.P., Sviderskiy, V.O.,  
974 Olszewski, J.L., Koerber, J.T., Xie, T., Beausoleil, S.A., *et al.* (2014). Quantitative proteomics  
975 reveal a feedforward mechanism for mitochondrial PARKIN translocation and ubiquitin chain  
976 synthesis. *Mol Cell* *56*, 360-375.



977  
978 Pakos-Zebrucka, K., Koryga, I., Mnich, K., Ljujic, M., Samali, A., and Gorman, A.M. (2016). The  
979 integrated stress response. *EMBO Rep* *17*, 1374-1395.  
980  
981 Pierson, T.C., and Diamond, M.S. (2020). The continued threat of emerging flaviviruses. *Nat*  
982 *Microbiol* *5*, 796-812.  
983  
984 Rabouw, H.H., Langereis, M.A., Anand, A.A., Visser, L.J., de Groot, R.J., Walter, P., and van  
985 Kuppeveld, F.J.M. (2019). Small molecule ISRIB suppresses the integrated stress response within  
986 a defined window of activation. *Proc Natl Acad Sci U S A* *116*, 2097-2102.  
987  
988 Rasool, S., Soya, N., Truong, L., Croteau, N., Lukacs, G.L., and Trempe, J.F. (2018). PINK1  
989 autophosphorylation is required for ubiquitin recognition. *EMBO Rep* *19*, e44981.  
990  
991 Ruff, E.F., Muretta, J.M., Thompson, A.R., Lake, E.W., Cyphers, S., Albanese, S.K., Hanson, S.M.,  
992 Behr, J.M., Thomas, D.D., Chodera, J.D., *et al.* (2018). A dynamic mechanism for allosteric  
993 activation of Aurora kinase A by activation loop phosphorylation. *Elife* *7*, e32766.  
994  
995 Samuel, M.A., Whitby, K., Keller, B.C., Marri, A., Barchet, W., Williams, B.R., Silverman, R.H.,  
996 Gale, M., Jr., and Diamond, M.S. (2006). PKR and RNase L contribute to protection against lethal  
997 West Nile Virus infection by controlling early viral spread in the periphery and replication in  
998 neurons. *J Virol* *80*, 7009-7019.  
999  
1000 Sekine, S., and Youle, R.J. (2018). PINK1 import regulation; a fine system to convey  
1001 mitochondrial stress to the cytosol. *BMC Biol* *16*, 2.  
1002  
1003 Sliter, D.A., Martinez, J., Hao, L., Chen, X., Sun, N., Fischer, T.D., Burman, J.L., Li, Y., Zhang, Z.,  
1004 Narendra, D.P., *et al.* (2018). Parkin and PINK1 mitigate STING-induced inflammation. *Nature*  
1005 *561*, 258-262.  
1006  
1007 Song, Y., Zhou, Y., and Zhou, X. (2020). The role of mitophagy in innate immune responses  
1008 triggered by mitochondrial stress. *Cell Commun Signal* *18*, 186.  
1009  
1010 Sprung, M., Dikic, I., and Novak, I. (2018). Flow Cytometer Monitoring of Bnip3- and Bnip3L/Nix-  
1011 Dependent Mitophagy. *Methods Mol Biol* *1759*, 105-110.  
1012  
1013 Stone, A.E.L., Green, R., Wilkins, C., Hemann, E.A., and Gale, M., Jr. (2019). RIG-I-like receptors  
1014 direct inflammatory macrophage polarization against West Nile virus infection. *Nat Commun*  
1015 *10*, 3649.  
1016  
1017 Suthar, M.S., Diamond, M.S., and Gale, M., Jr. (2013). West Nile virus infection and immunity.  
1018 *Nat Rev Microbiol* *11*, 115-128.  
1019

- 1020 Taylor, R.T., Lubick, K.J., Robertson, S.J., Broughton, J.P., Bloom, M.E., Bresnahan, W.A., and  
1021 Best, S.M. (2011). TRIM79alpha, an interferon-stimulated gene product, restricts tick-borne  
1022 encephalitis virus replication by degrading the viral RNA polymerase. *Cell Host Microbe* *10*, 185-  
1023 196.
- 1024
- 1025 Torii, S., Kasai, S., Yoshida, T., Yasumoto, K.I., and Shimizu, S. (2020). Mitochondrial E3 Ubiquitin  
1026 Ligase Parkin: Relationships with Other Causal Proteins in Familial Parkinson's Disease and Its  
1027 Substrate-Involved Mouse Experimental Models. *Int J Mol Sci* *21*, 1202.
- 1028
- 1029 Tricou, V., Minh, N.N., Farrar, J., Tran, H.T., and Simmons, C.P. (2011). Kinetics of viremia and  
1030 NS1 antigenemia are shaped by immune status and virus serotype in adults with dengue. *PLoS*  
1031 *Negl Trop Dis* *5*, e1309.
- 1032
- 1033 West, A.P., Khoury-Hanold, W., Staron, M., Tal, M.C., Pineda, C.M., Lang, S.M., Bestwick, M.,  
1034 Duguay, B.A., Raimundo, N., MacDuff, D.A., *et al.* (2015). Mitochondrial DNA stress primes the  
1035 antiviral innate immune response. *Nature* *520*, 553-557.
- 1036
- 1037 Xia, H., Luo, H., Shan, C., Muruato, A.E., Nunes, B.T.D., Medeiros, D.B.A., Zou, J., Xie, X., Giraldo,  
1038 M.I., Vasconcelos, P.F.C., *et al.* (2018). An evolutionary NS1 mutation enhances Zika virus  
1039 evasion of host interferon induction. *Nat Commun* *9*, 414.
- 1040
- 1041 Yang, K., Huang, R., Fujihira, H., Suzuki, T., and Yan, N. (2018). N-glycanase NGLY1 regulates  
1042 mitochondrial homeostasis and inflammation through NRF1. *J Exp Med* *215*, 2600-2616.
- 1043 Youle, R.J. (2019). Mitochondria-Striking a balance between host and endosymbiont. *Science*  
1044 *365*.
- 1045
- 1046 Yu, C.Y., Chang, T.H., Liang, J.J., Chiang, R.L., Lee, Y.L., Liao, C.L., and Lin, Y.L. (2012). Dengue  
1047 virus targets the adaptor protein MITA to subvert host innate immunity. *PLoS Pathog* *8*,  
1048 e1002780.
- 1049
- 1050 Zhang, L., Qin, Y., and Chen, M. (2018). Viral strategies for triggering and manipulating  
1051 mitophagy. *Autophagy* *14*, 1665-1673.
- 1052
- 1053 Zorba, A., Buosi, V., Kutter, S., Kern, N., Pontiggia, F., Cho, Y.J., and Kern, D. (2014). Molecular  
1054 mechanism of Aurora A kinase autophosphorylation and its allosteric activation by TPX2. *Elife* *3*,  
1055 e02667.
- 1056
- 1057
- 1058
- 1059
- 1060

1061 **Figures and Legends:**

1062

1063 **Figure 1: Ajuba negatively regulates MAVS expression. A.** IFN $\beta$  mRNA induction following  
1064 ectopic expression of MAVS alone or together with Ajuba or LIMD1 in HEK293T cells. **B.** Protein  
1065 expression from an experiment in A. **C.** Confocal images of FLAG-Ajuba in either mock infected  
1066 or SenV-infected cells stained for total mitochondria using mitotracker (green) and Ajuba (red).  
1067 DAPI counterstains the nuclei. **D.** The experiment in A. was repeated with cells treated with  
1068 200nM bafilomycin A1 (BafA1) or 200nM epoxomicin (epox) for 6 h prior to cell lysis. **E.**  
1069 Western blot of HeLa cells transfected with MAVS, WT Parkin, C431F Parkin or Ajuba. DNA was  
1070 normalized using a GFP expressing control plasmid. Error bars represent mean $\pm$ SD; \*P<0.05,  
1071 \*\*P<0.01, \*\*\*P<0.001 by one-way ANOVA.

1072

1073 **Figure 2: Ajuba is regulated by PINK1-Parkin mediated degradation during mitophagy. A.**  
1074 Western blot of HEK293T cells expressing FLAG-Ajuba and treated with 10 $\mu$ M CCCP for the  
1075 times indicated followed by cellular fractionation. Vinculin and TIM44 are used as fractionation  
1076 controls for cytosol and mitochondrial enrichment, respectively. **B.** Western blot of HEK293T  
1077 cells expressing GFP or FLAG-Ajuba and treated with tunicamycin or oligomycin for 5 h at  
1078 5 $\mu$ g/ml. **C.** Western blot of HEK293T cells expressing FLAG-Ajuba following treatment with CCCP  
1079 or starvation in Earl's balanced salt solution (EBSS) for 6 h. Mfn1 and FAM134B are used as  
1080 positive controls for mitophagy and bulk autophagy, respectively. **D.** HeLa cells engineered to  
1081 express Parkin or knocked out for PINK1 were transfected with FLAG-Ajuba and treated with  
1082 10 $\mu$ M CCCP for 6 h. Quantification of Ajuba and Mfn1 expression by densitometry for 3  
1083 experiments is shown. **E.** Representative Seahorse analysis of oxygen consumption rate (OCR) in  
1084 WT, Ajuba<sup>-/-</sup> or PINK1<sup>-/-</sup> MEFs following treatment with oligomycin (2 $\mu$ M), FCCP (2 $\mu$ M) or  
1085 rotenone + Antimycin A (0.5 $\mu$ M each). **F.** Calculated OCR associated with mitochondrial  
1086 functions from three independent experiments performed in triplicate (mean $\pm$ SD); \*P<0.05 by  
1087 two-way ANOVA.

1088

1089 **Figure 3: Ajuba interacts with PINK1, and promotes PINK1 autophosphorylation and**  
1090 **mitophagy. A.** Mean fluorescence intensity of WT or Ajuba<sup>-/-</sup> MEFs were labeled with  
1091 mitotracker green (200nM). **B.** WT or Ajuba<sup>-/-</sup> MEFs were labeled with mitotracker green and  
1092 mitotracker red (200nM), treated with 10 $\mu$ M CCCP for 16 h with or without BafA1, and  
1093 analyzed by flow cytometry. **C.** Reciprocal IP of *E.coli*-expressed human PINK1 and Ajuba. **D.**  
1094 Autophosphorylation of human PINK1 (300nM) in the presence of increasing concentrations of  
1095 Ajuba (0-300nM). Total protein was normalized with bovine serum albumin. **E.** Quantification of  
1096 pThr257/total PINK1. **F.** Confocal microscopy of HeLa cells transfected with a plasmid  
1097 expressing HA-Ub, followed by treatment with 10 $\mu$ M CCCP for 2 h and stained for pSer65-Ub  
1098 (green). Nuclei were counterstained with DAPI (blue). **G.** Quantification of pSer65-Ub puncta  
1099 per cell in HeLa cells in E demonstrating that signals are specific to PINK1-Parkin mediated  
1100 mitophagy. **H.** pSer65-Ub assay in HEK293T cells expressing GFP or Ajuba. **I.** Western blot for  
1101 total pSer65-Ub in HEK293T cells expressing Ajuba and treated with 10 $\mu$ M CCCP for 2 h. Error  
1102 bars represent mean $\pm$ SD from 3-4 independent experiments; \*P<0.05, \*\*P<0.01, \*\*\*P<0.001  
1103 by one-way ANOVA.

1104  
1105 **Figure 4: Zika virus NS5 binds to Ajuba to suppress mitophagy. A.** pSer65-Ub assay in HEK293T  
1106 cells infected with ZIKV for 48 h and then treated with or without 10 $\mu$ M CCCP for 2 h. Error bars  
1107 represent mean $\pm$ SD; \*\*\*P<0.001 by one-way ANOVA. **B.** IP of FLAG-Ajuba and ZIKV NS5-HA  
1108 expressed in HEK293T cells. **C.** Confocal microscopy demonstrating cytosolic co-localization of  
1109 FLAG-Ajuba (red) and ZIKV NS5-HA (greyscale). **D.** HEK293T cells were transfected with plasmids  
1110 expressing FLAG-Ajuba, GFP-Parkin and either GFP or ZIKV NS5-HA. Cells were treated with  
1111 10 $\mu$ M CCCP for the times indicated. Cells were fractionated into mitochondrial fractions  
1112 (enriched for TIMM44) or cytosolic fractions (enriched for vinculin and calreticulin)  
1113 demonstrating that CCCP-induced mitochondrial localization of Ajuba and Parkin is delayed in  
1114 the presence of ZIKV-NS5. **E.** Confocal microscopy of Huh7 cells expressing single plasmids  
1115 encoding Ajuba-FLAG, MAVS, or ZIKV NS5-HA. Only MAVS strongly colocalizes with  
1116 mitochondria stained for TOM20 (greyscale). **F.** Confocal image of cells co-expressing MAVS and  
1117 Ajuba demonstrating recruitment of Ajuba to MAVS-positive mitochondria and disruption of

1118 MAVS aggregates (arrow). **G.** Confocal image demonstrating that co-expression of ZIKV NS5 in  
1119 cells also expressing MAVS and Ajuba suppresses Ajuba recruitment and maintains MAVS  
1120 aggregates.

1121

1122 **Figure 5: ZIKV replication in mitophagy-deficient MEFs is associated with amplified**  
1123 **chemokine expression, PKR phosphorylation, and release of mitochondrial dsRNA. A.-B.**  
1124 RNAseq in 3 replicate cultures of WT, PINK1<sup>-/-</sup> or Ajuba<sup>-/-</sup> MEFs that were **A.** mock-infected, or **B.**  
1125 infected with ZIKV with MOI 0.1 and harvested at 72 hpi. **C.** Chemokine and IFN gene expression  
1126 changes (log2 fold change) in ZIKV-infected cells compared to mock-infected cells at 72 hpi. **D.**  
1127 ZIKV growth curves in WT (black) and Ajuba<sup>-/-</sup> (blue) MEFs treated with isotype control (open  
1128 symbols) or anti-IFNAR1 mAb (closed symbols). \*P≤0.05 by Mann-Whitney test. **E.** ZIKV growth  
1129 curves in WT (black) and PINK1<sup>-/-</sup> (pink) MEFs treated with isotype control (open symbols) or  
1130 anti-IFNAR1 mAb (closed symbols). **F.** Transmission electron microscopy images of WT and  
1131 Ajuba<sup>-/-</sup> MEF at 72 hpi with ZIKV. White arrowheads indicate mitochondria; yellow arrowheads  
1132 indicate sites of virus replication. **G.** Western blot demonstrating that ZIKV infection increases  
1133 expression levels of PKR, phospho-PKR and ATF4 in the absence of PINK1 or Ajuba. Basal levels  
1134 of phospho-PKR and ATF4 are also increased in uninfected PINK1<sup>-/-</sup> and Ajuba<sup>-/-</sup> MEFs compared  
1135 to WT MEFs. **H.** Quantification by densitometry of p-PKR/PKR ratio in ZIKV-infected MEFs from  
1136 2 independent experiments. **I.** WT, PINK1<sup>-/-</sup> or Ajuba<sup>-/-</sup> MEFs were stained for mitochondria  
1137 (TOM20, red) and dsRNA (J2, green) at 4 h post treatment with vehicle or CCCP. Staining  
1138 intensity of dsRNA was quantified by image J software. \*\*\*\*P<0.001 by two-way ANOVA. **J.**  
1139 Treatment of MEFs with ethidium bromide (EthBr) demonstrating loss of mitochondrial  
1140 genome-encoded cytochrome B (cytochrome B) but not nuclear genome-encoded Mfn1. **K.**  
1141 EthBr treatment suppresses PKR phosphorylation in ZIKV-infected MEFs.

1142

1143 **Figure 6: The ISR favors virus replication but is uncoupled from pro-inflammatory chemokine**  
1144 **and cytokine expression dependent on PKR.** Primary human dermal fibroblasts were infected  
1145 with ZIKV (MOI 1) and treated with 500nM ISRIB or C16 for 24h prior to harvest. Release of  
1146 infectious virus was measured by plaque assay. Inhibition of **B.** eIF2α phosphorylation or **C.** PKR

1147 phosphorylation was verified by Western blotting. **D.** Chemokines and **E-F.** cytokines were  
1148 measured by Bioplex multiplex assay in culture supernatants from uninfected cells or cells  
1149 infected with ZIKV at 24, 48 and 72 hpi. Error bars represent mean±SD from two experiments  
1150 performed in triplicate; \*P<0.05, \*\*P<0.01, \*\*\*P<0.001, \*\*\*\*P<0.0001 by one-way ANOVA.

1151

1152 **Figure 7: Pro-inflammatory chemokines are expressed earlier in ZIKV-infected *Ajuba*<sup>-/-</sup> mice**  
1153 **associated with increased virus invasion of tissues.** WT and *Ajuba*<sup>-/-</sup> mice were treated with 2  
1154 mg anti-IFNAR mAb one day prior to infection with 10<sup>3</sup> PFU ZIKV. **A.** Serum protein levels of the  
1155 chemokines and cytokines measured by Bioplex multiplex assays. \*P≤0.05 by one-way ANOVA.  
1156 **B.** Virus titers at 3 and 5 dpi in serum and tissues measured by plaque forming units (PFU)/ml  
1157 serum. Error bars represent mean±SD; \*P<0.05, \*\*P<0.01, \*\*\*\*P<0.0001 by Mann-Whitney  
1158 test.

1159

1160 **Supplementary Figures and Legends:**

1161

1162 **Supplemental Figure 1: *Ajuba* negatively regulates MAVS expression.** **A.** Efficiency of mRNA  
1163 depletion of *AJUBA* or *LIMD1* in A549 cells at 48 h post transfection with siRNAs targeting each  
1164 gene. **B.** Titer of VSV at 24 hpi of cells from C. Error bars represent mean±SD from 2  
1165 independent experiments performed in duplicate; \*P<0.05, \*\*P<0.01, \*\*\*P<0.001 by one-way  
1166 ANOVA.

1167

1168 **Supplemental Figure 2: Design and verification of *Ajuba*<sup>-/-</sup> mice using CRISPR/Cas9-mediated**  
1169 **gene editing.** **A.** Exon structure of the *Ajuba* gene. *Ajuba* Exon 1 was targeted by the gRNA  
1170 sequence CCGGAGTCCGAGAGTCTCAACTT. **B.** Sequence verification of gene disruption in two  
1171 lines of mice designated 8216A and 8258B. **C.** Summary of sequence modifications and **D.**  
1172 Predicted potential ORF expression.

1173

1174 **Supplemental Figure 3. *Ajuba* is phosphorylated by PINK1.** **A.** Confocal microscopy of HEK293T  
1175 cells expressing FLAG-*Ajuba* (red), PINK1-V5 (green) or both showing co-localization of the two

1176 proteins (yellow). Nuclei were counterstained with DAPI (blue). **B.** Predicted phosphorylation  
1177 Ser/Thr sites in the pre-LIM region of Ajuba are associated with PINK1, TBK1,  
1178 AKT/PKA/PKB/PKC, and CDK1. Therefore Ajuba was expressed alone or co-expressed with TBK1  
1179 or PINK1 and run on SDS-PAGE. Two bands were excised for analysis by mass spectrometry. The  
1180 upper band (B) was identified as highly phosphorylated Ajuba. **C.** Ajuba sequence with  
1181 predicted phosphorylation sites indicated. The table summarizes the mass spectrometry data  
1182 showing the spectral counts of basally expressed (Band A) and highly phosphorylated Ajuba  
1183 (Band B). This analysis suggested that Ajuba is basally phosphorylated at S79 and S119. TBK1  
1184 induced further phosphorylation at S47, S69, S104, S141, S133 and S166. PINK1 induced specific  
1185 phosphorylation of Ajuba at S39, but also induced phosphorylation of the TBK1-dependent  
1186 residues as summarized in the Venn diagram.

1187

1188 **Supplemental Figure 4. RNAseq and DEG expression in WT, PINK1<sup>-/-</sup> and Ajuba<sup>-/-</sup> MEFs. A.**

1189 Gene Ontology (GO) terms from IPA analysis demonstrating higher expression of interferon and  
1190 inflammatory pathways in the absence of PINK1 or Ajuba, including the role of PKR in interferon  
1191 induction and antiviral response. **B.** Log P value of chemokine expression shown in Figure 6E. **C.**  
1192 Individual genes from the pathway designated as 'role of PKR (EIF2AK2) in interferon induction  
1193 and antiviral response' demonstrating high expression in Ajuba<sup>-/-</sup> and PINK1<sup>-/-</sup> MEFs.

1194

1195 **Supplemental Figure 5. Ajuba mRNA expression in mouse tissues by RNAScope. Ajuba mRNA**

1196 staining (brown) was observed in **A.** keratinocytes and endothelial cells in the skin, **B.** Sertoli  
1197 cells in the testes, **C.** hepatocytes (arrowheads) and endothelial cells in the liver, **D.** epithelial  
1198 and endothelial cells in the lung, **E.** ependymal cells and **F.** neurons (black arrowheads) and  
1199 endothelial cells (white arrowheads) in the CNS. Tissue sections were counterstained with  
1200 hematoxylin.

1201

1202 **Supplemental Figure 6. Schematic representation of findings. ZIKV virus suppresses PINK1-**

1203 Parkin-dependent mitophagy through the actions of NS5 binding to and inhibiting mitochondrial  
1204 recruitment of Ajuba. This results in mitochondrial RNA release and PKR activation and

1205 activation of the ISR to create a cellular environment that favors virus replication. However,  
1206 PKR-dependent amplification of chemokines and specific cytokines central to the pro-  
1207 inflammatory response to ZIKV is uncoupled from virus replication.



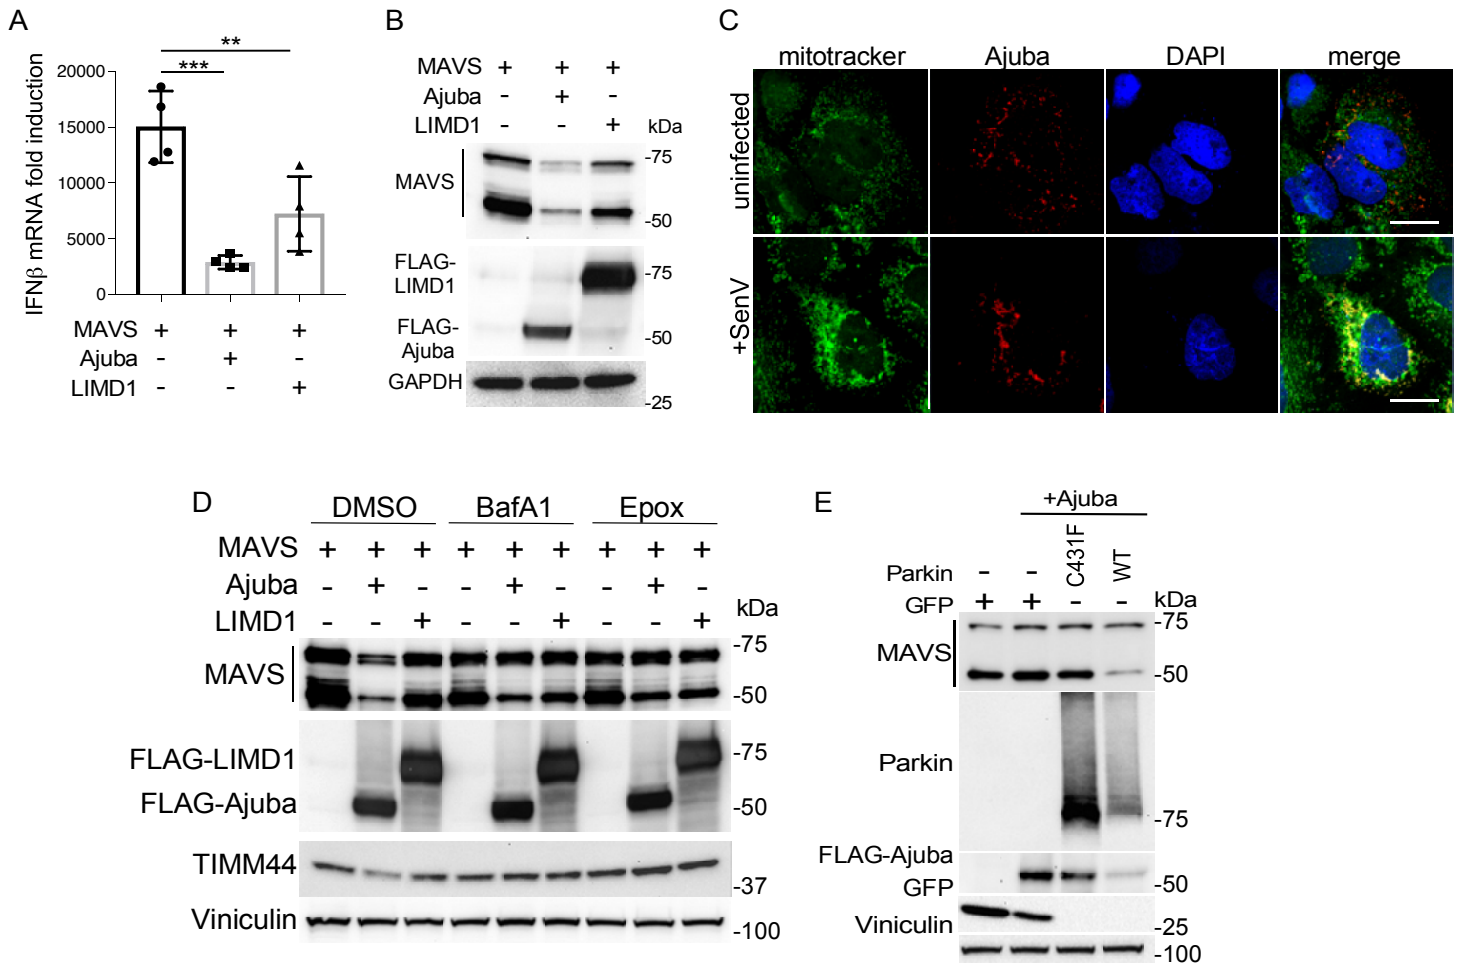

Figure 1

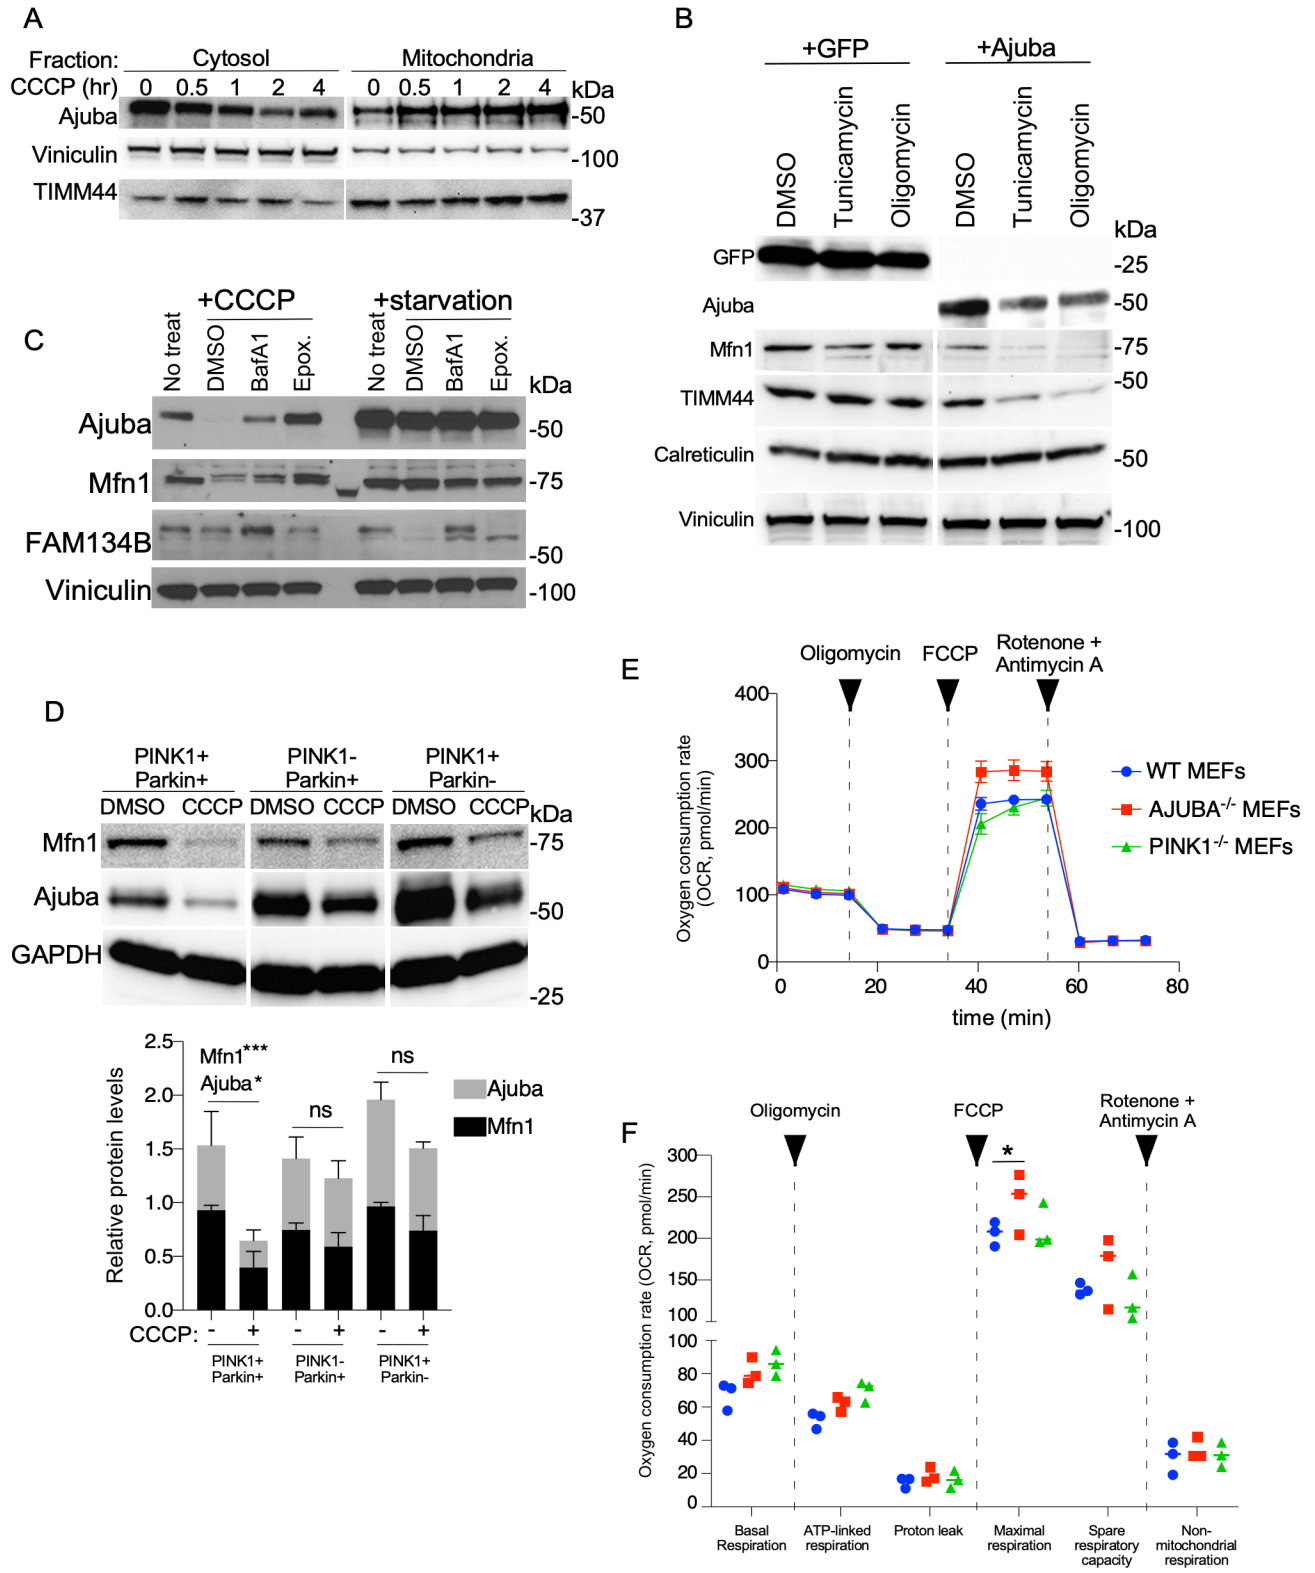

Figure 2

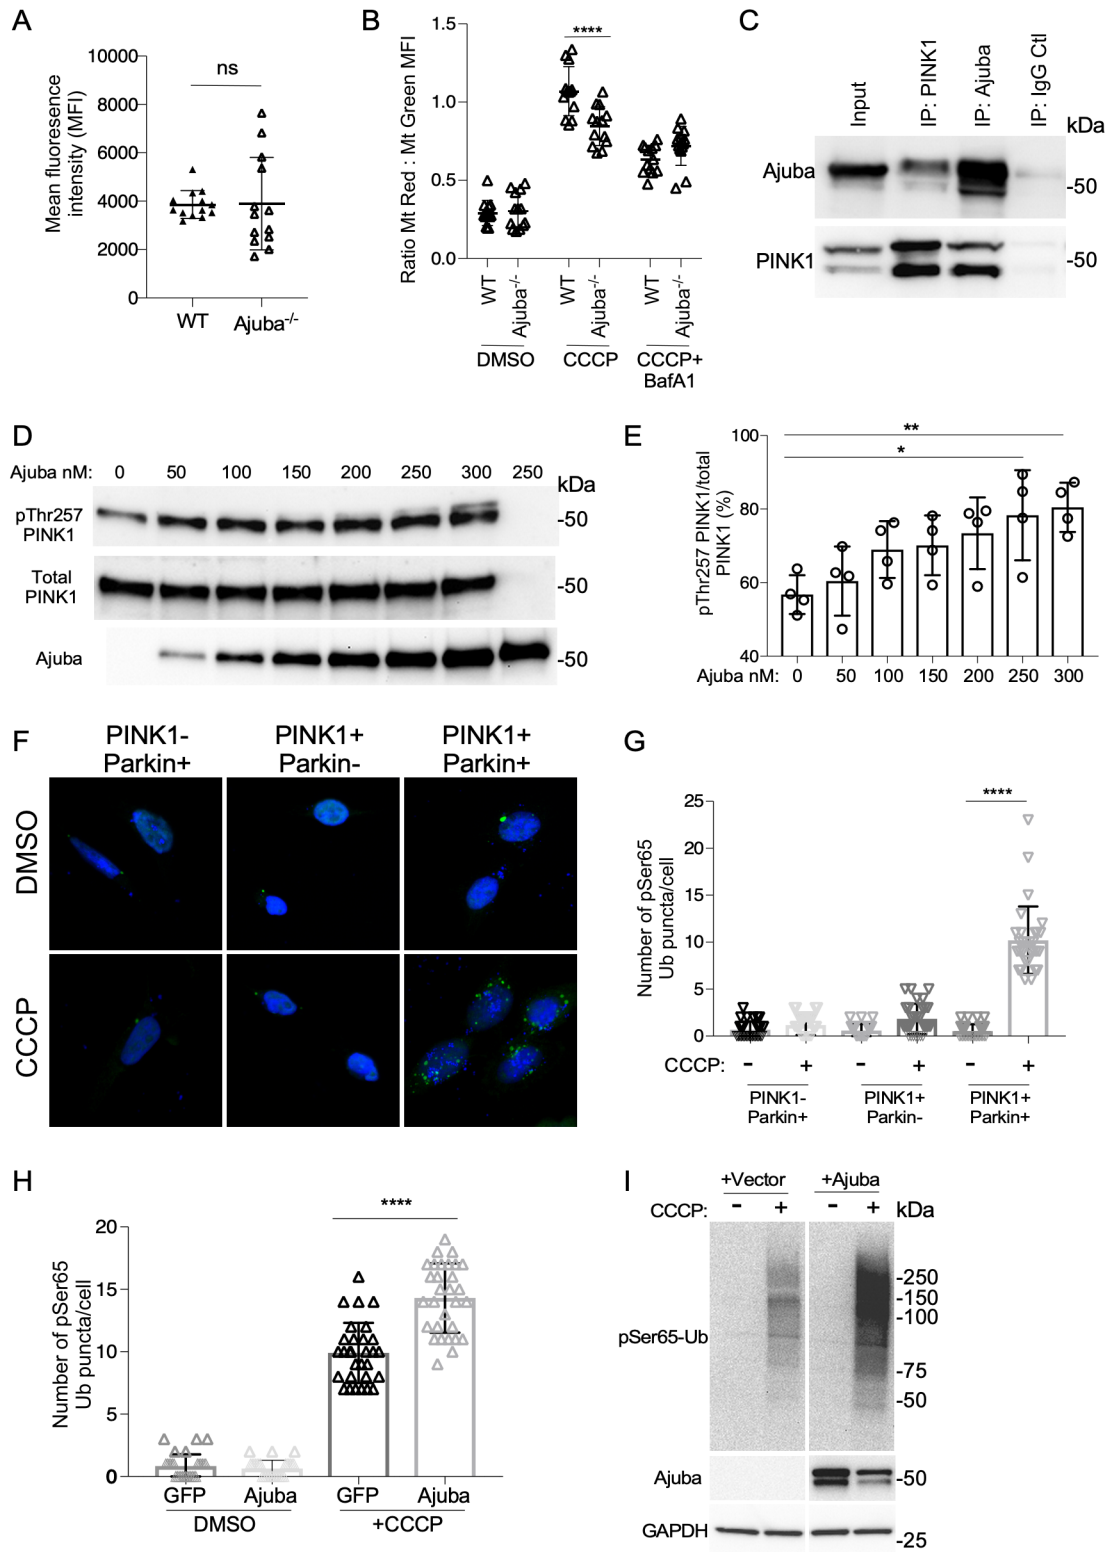

Figure 3

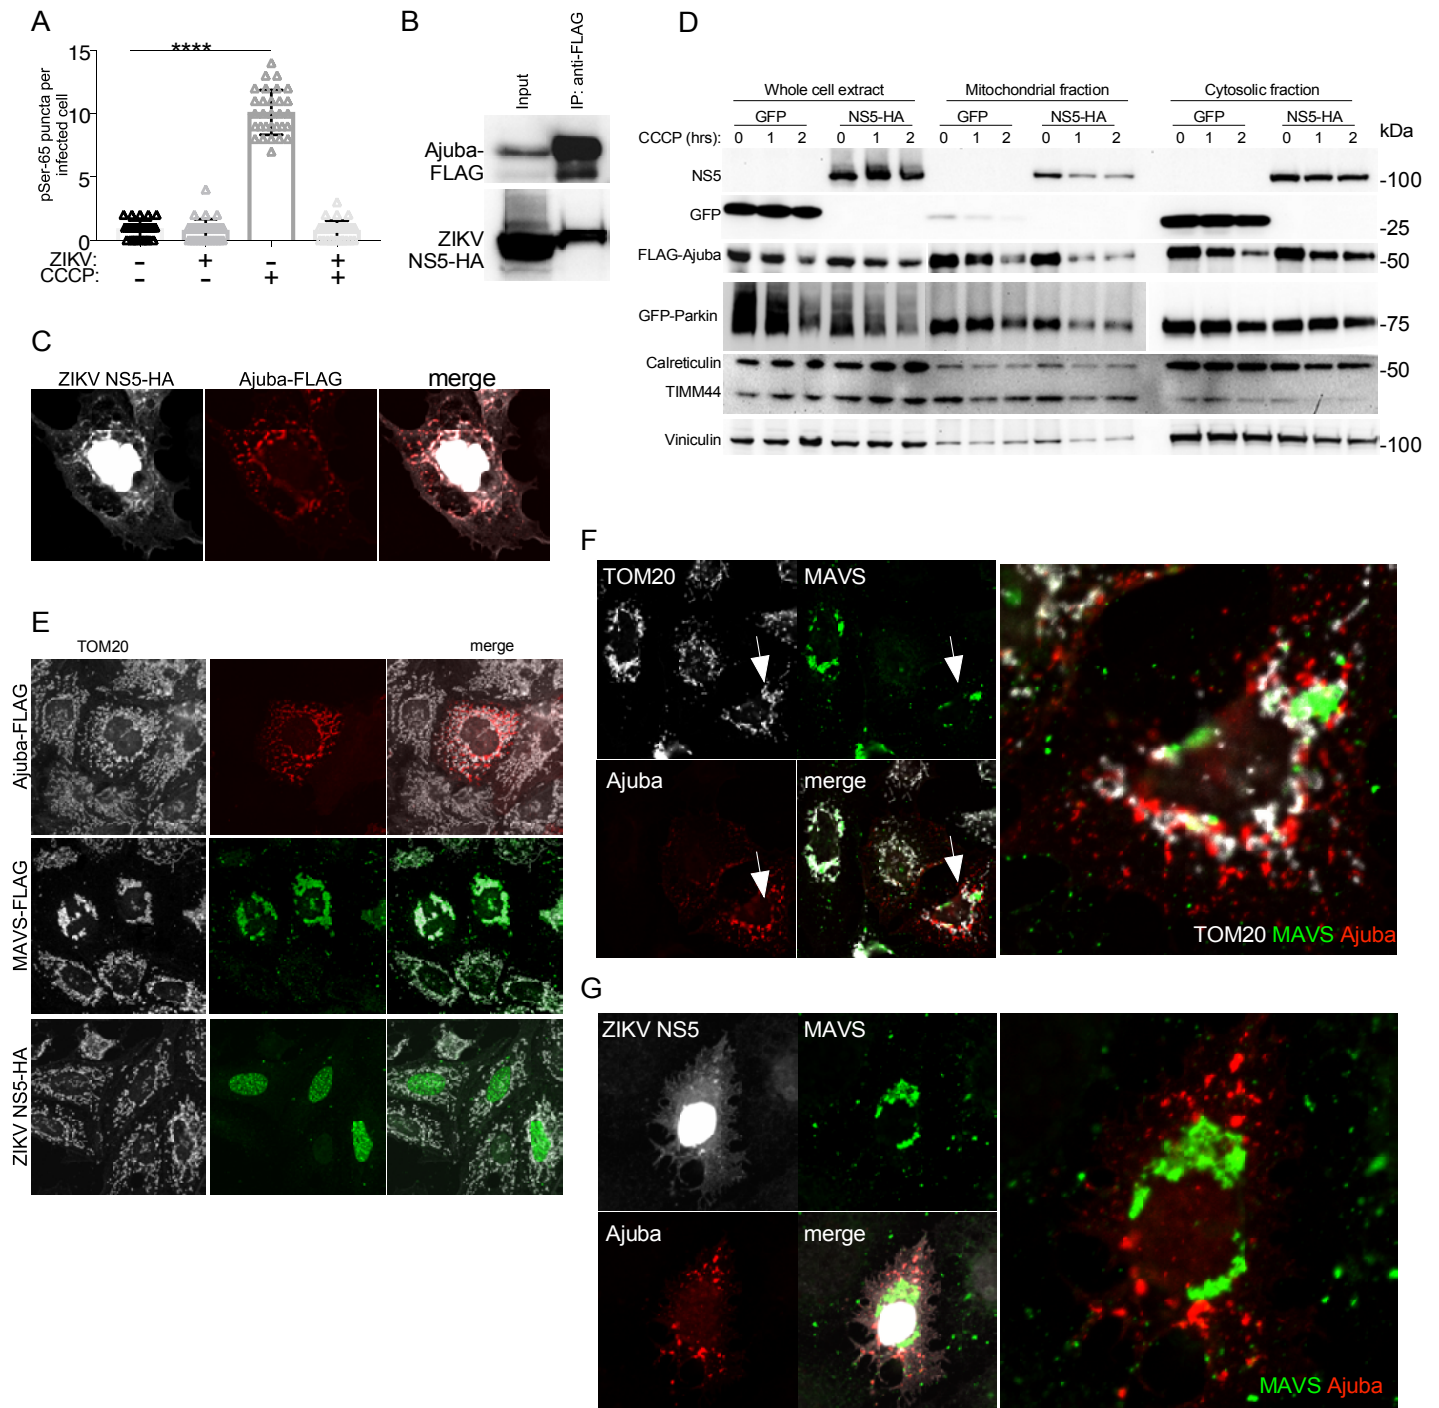

Figure 4



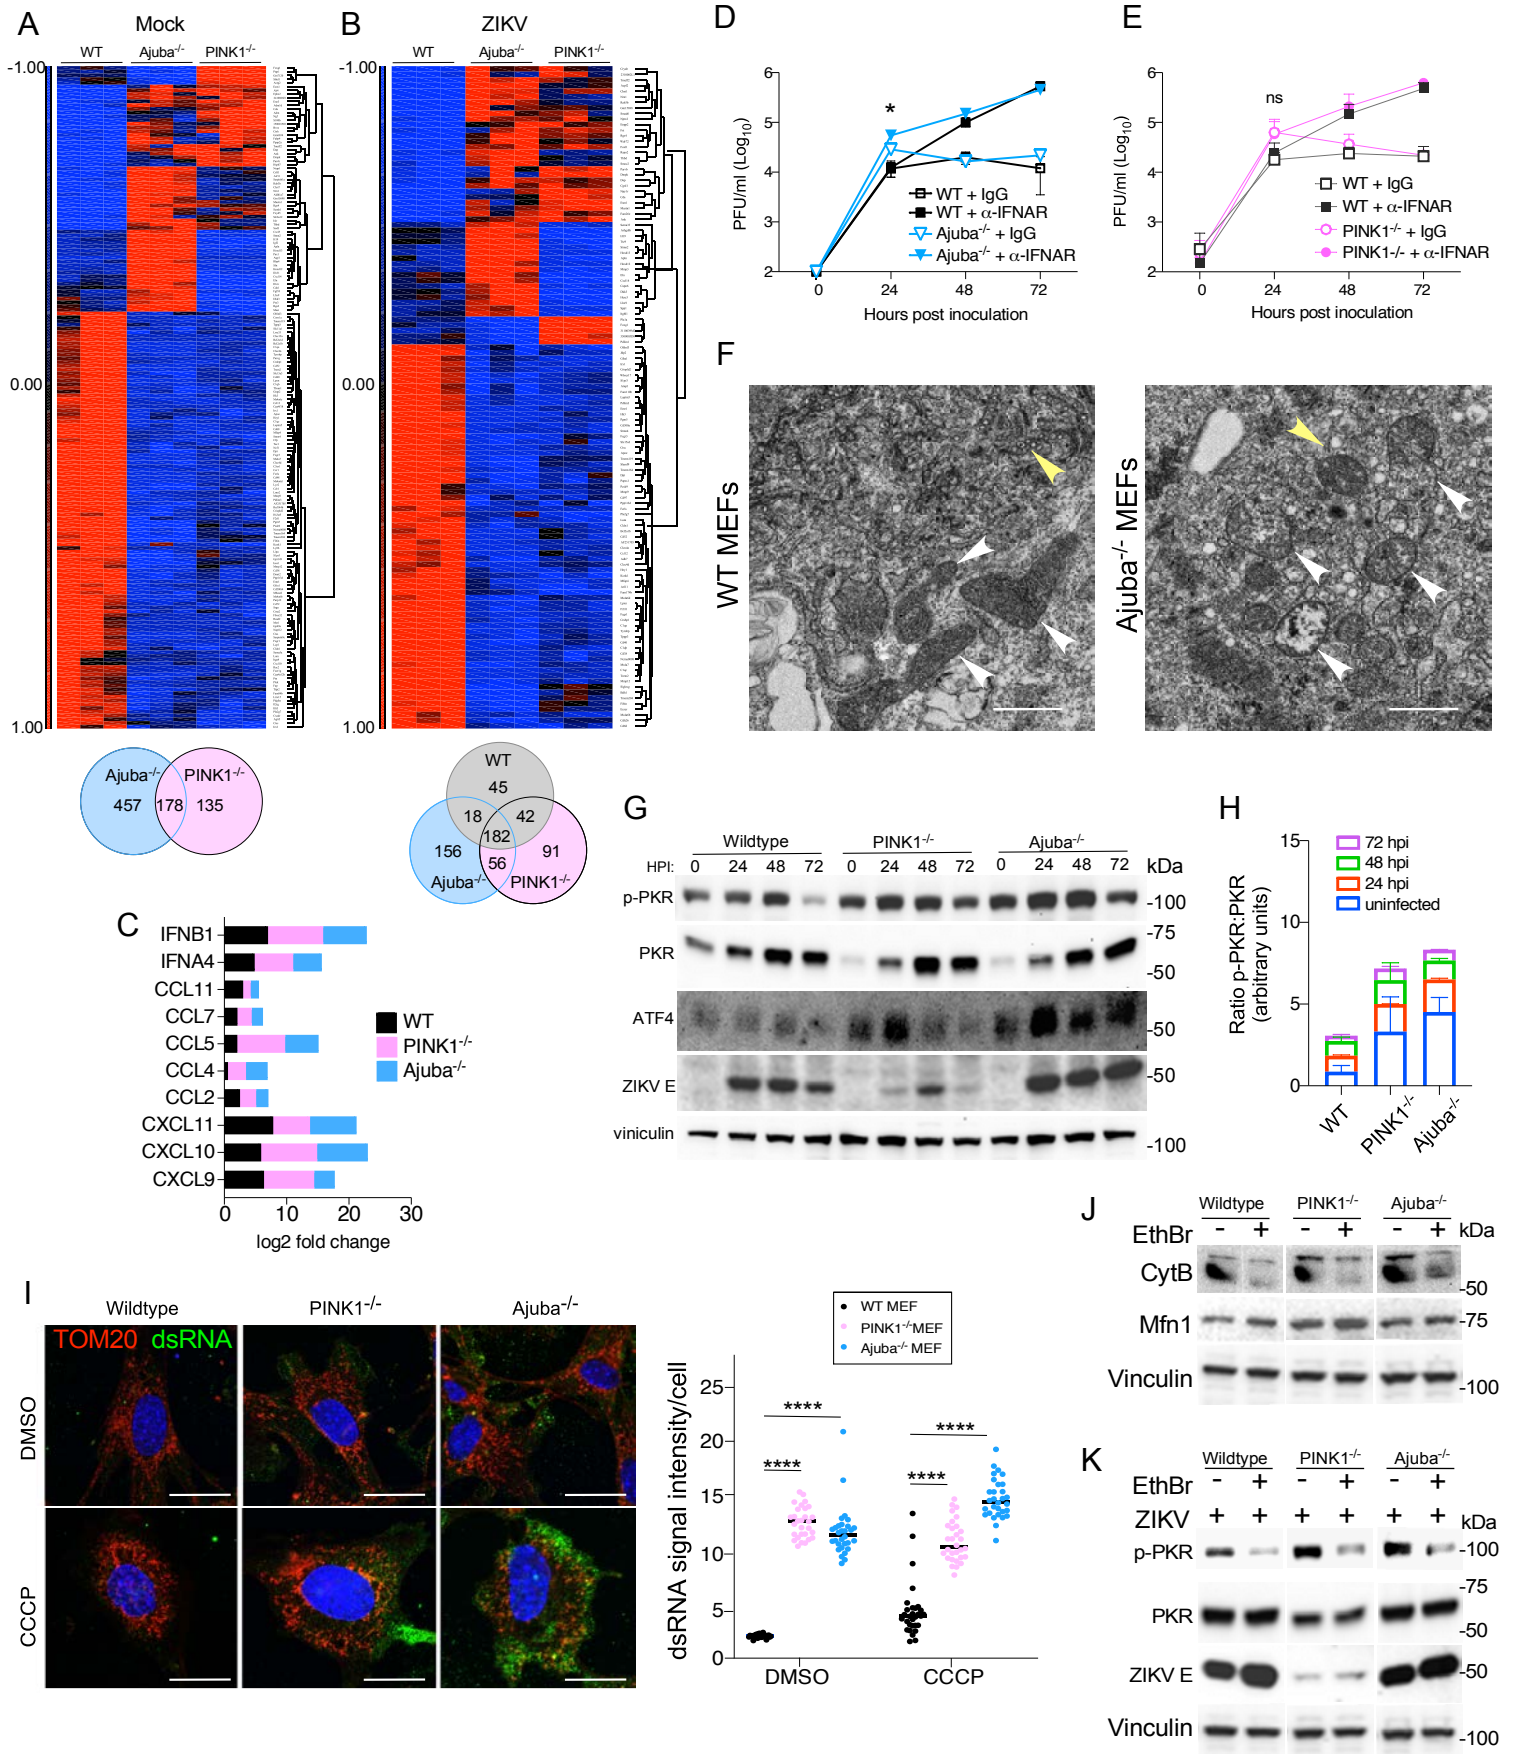

Figure 5

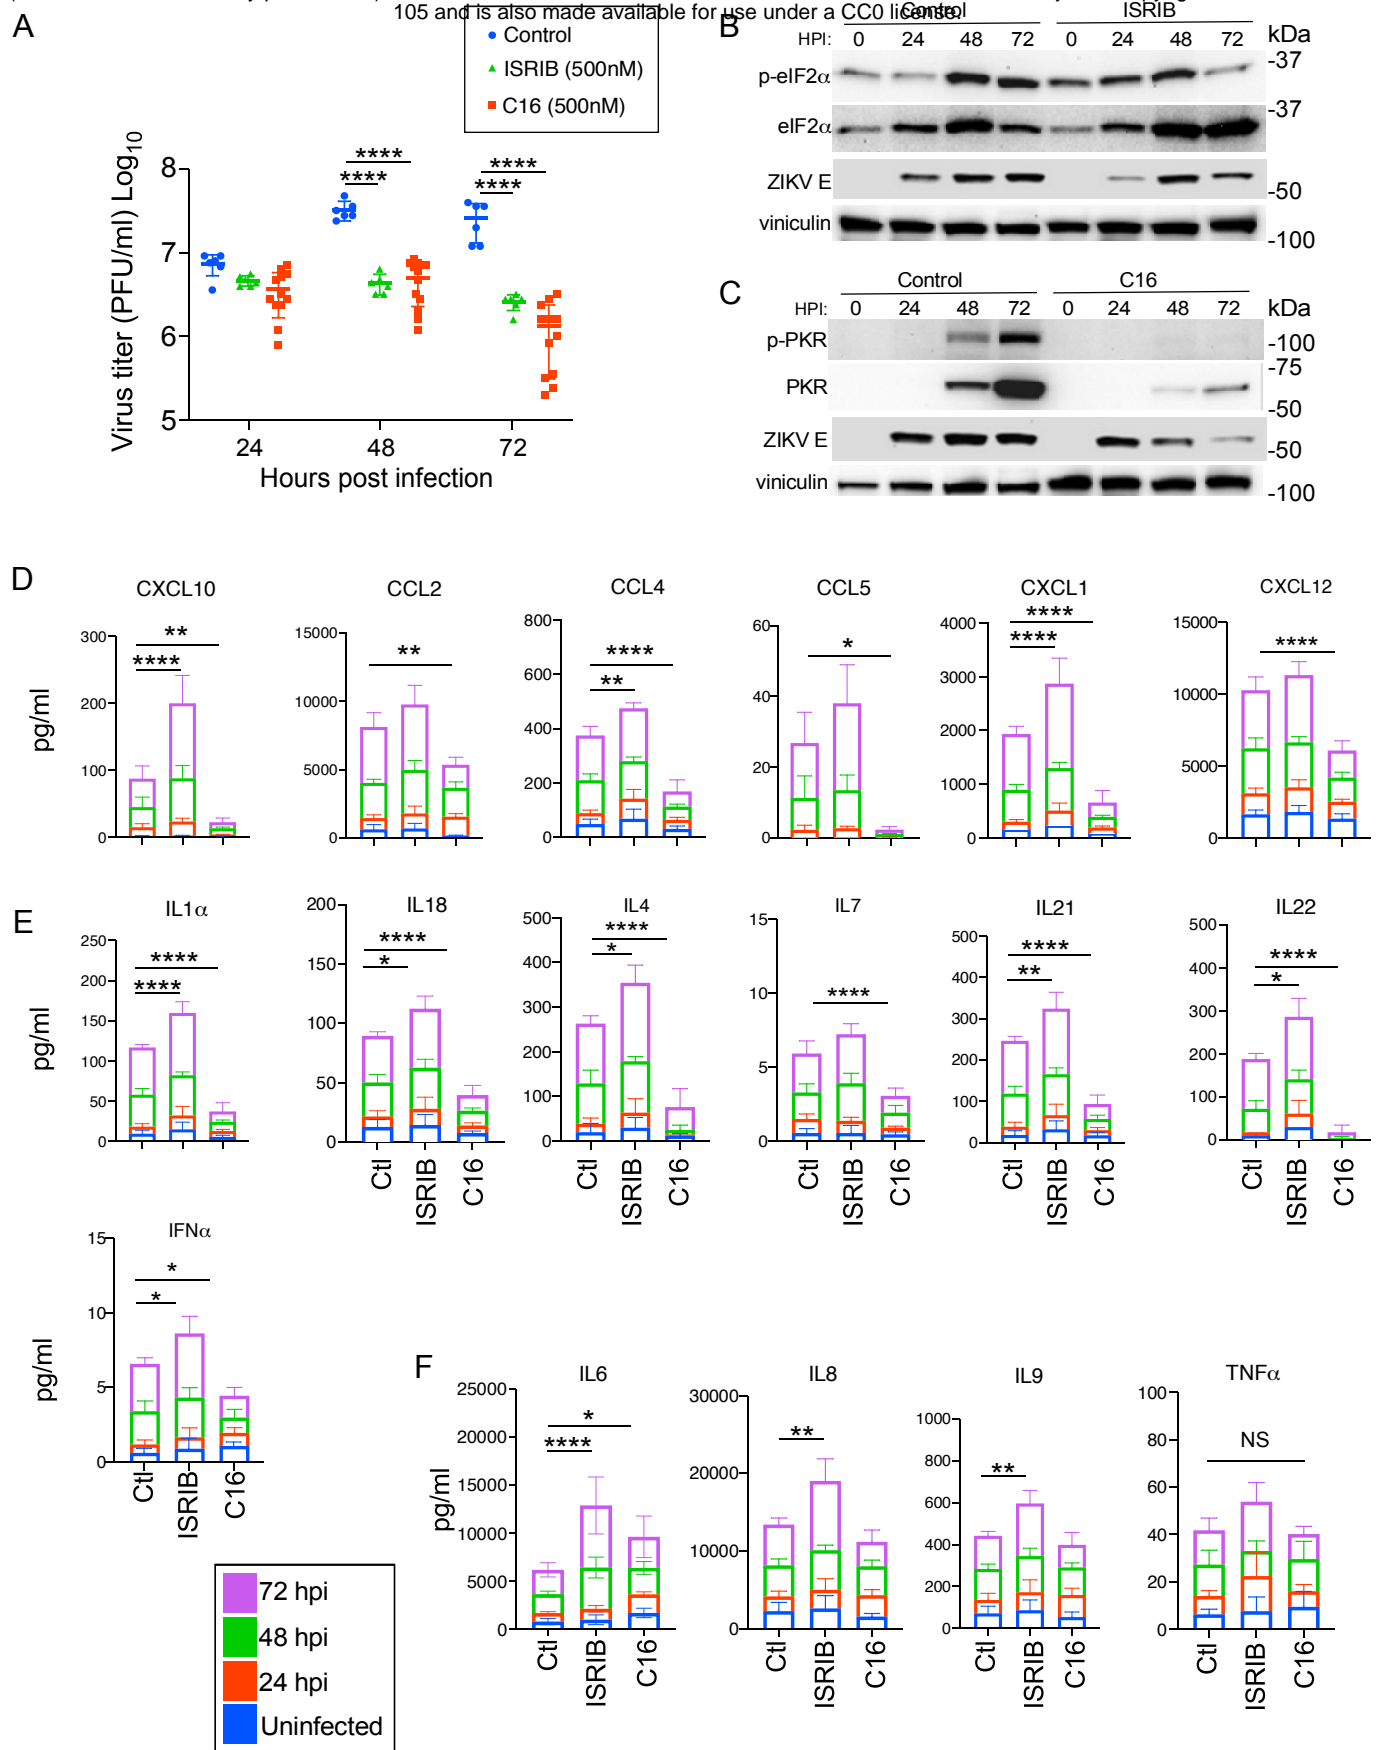

Figure 6

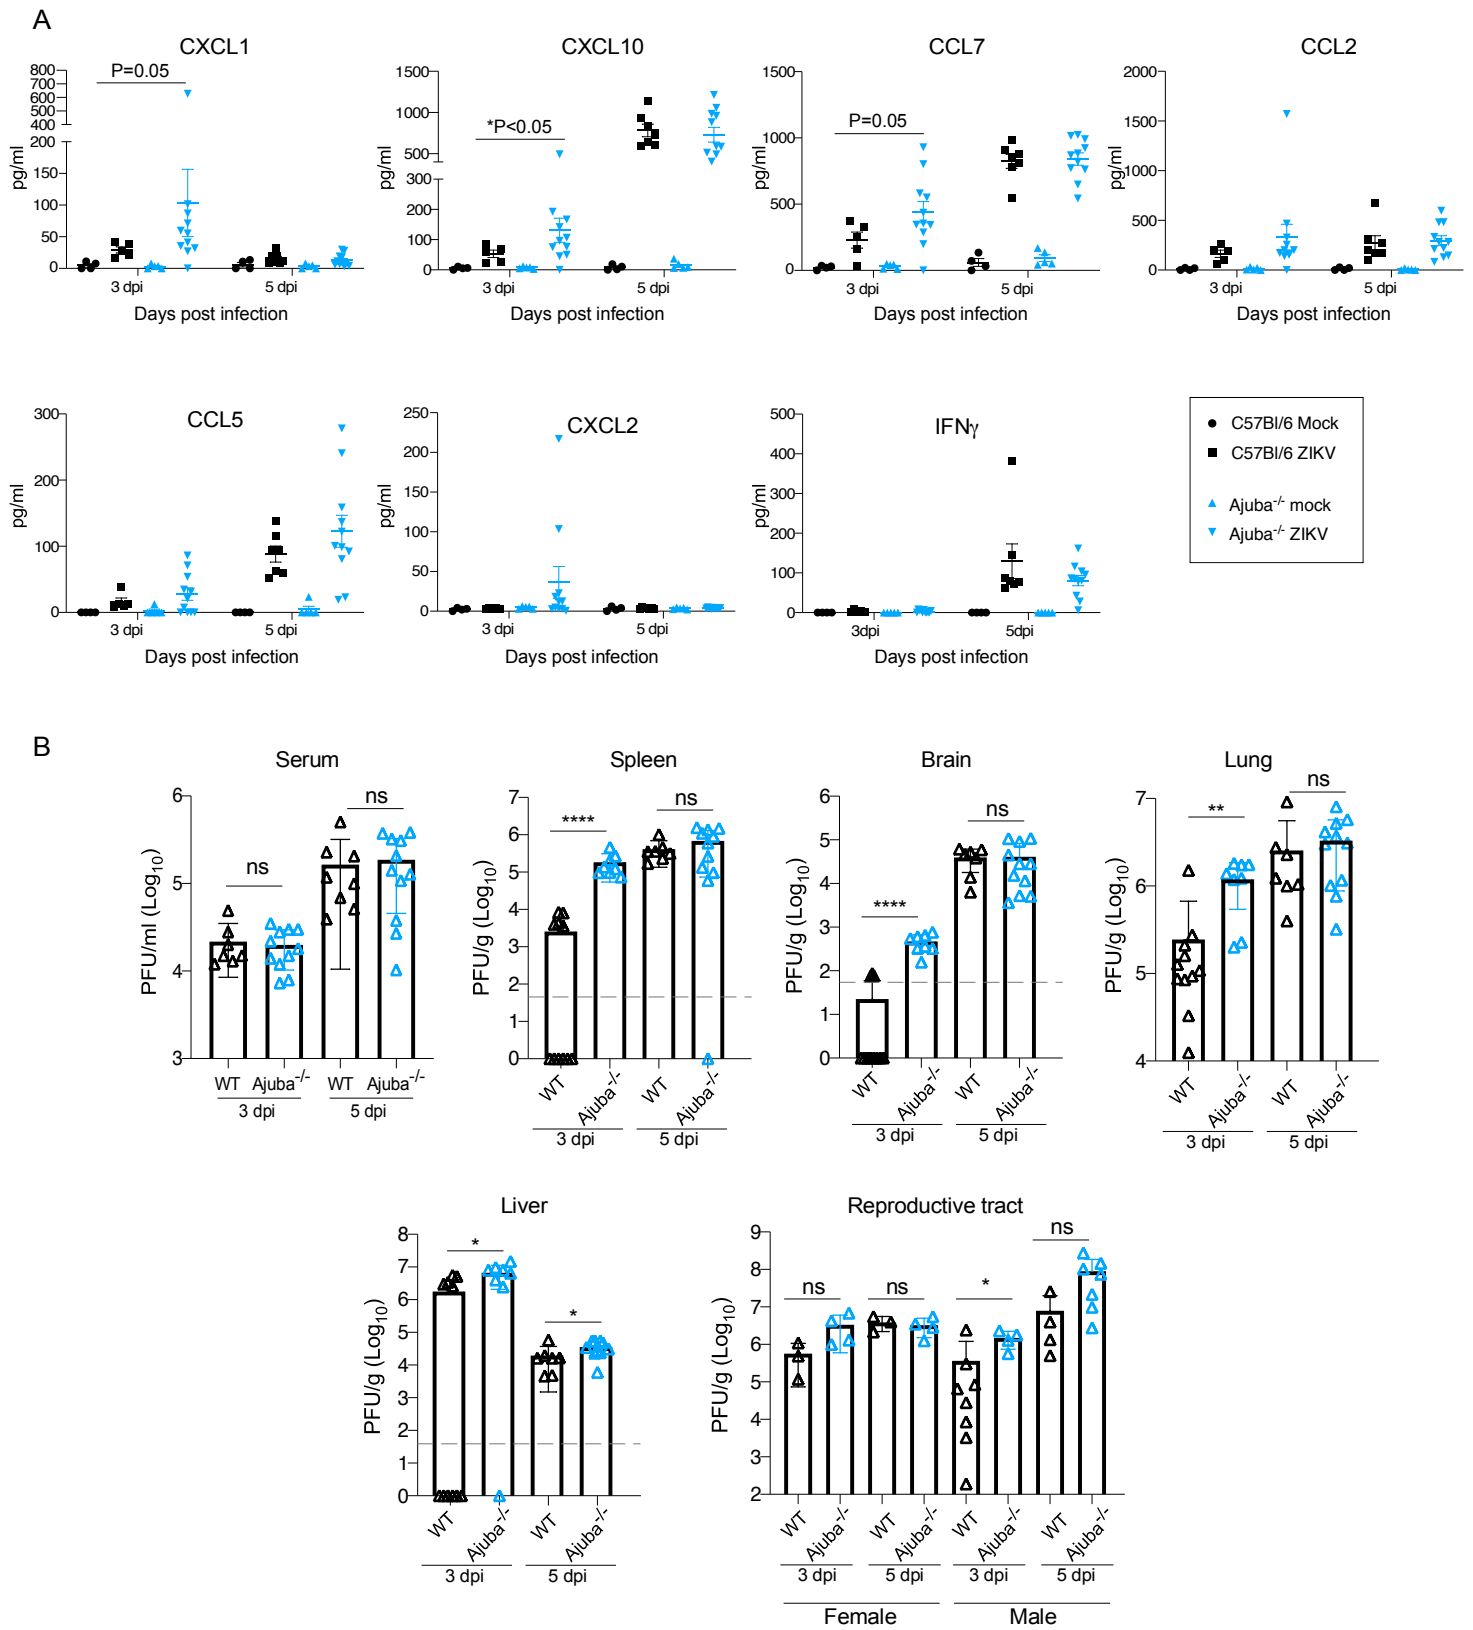

Figure 7



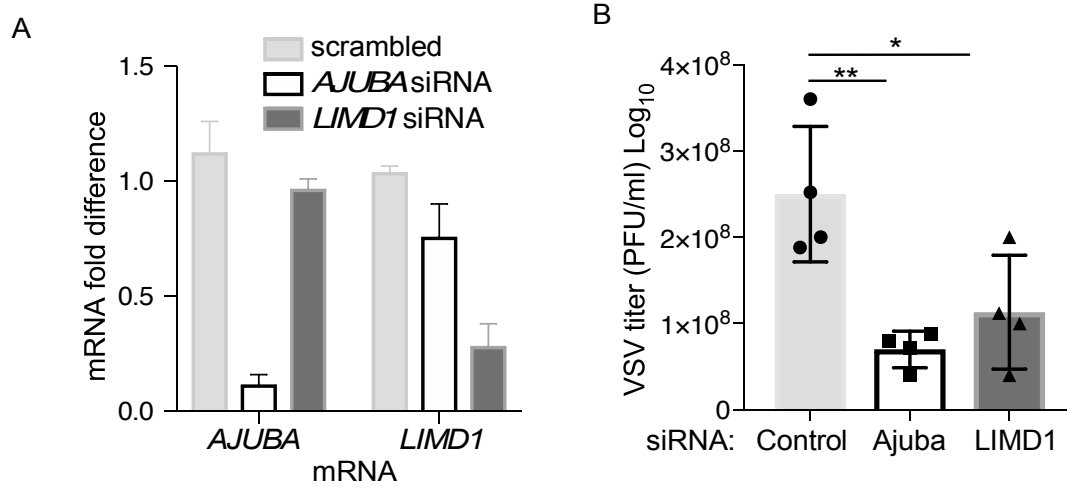

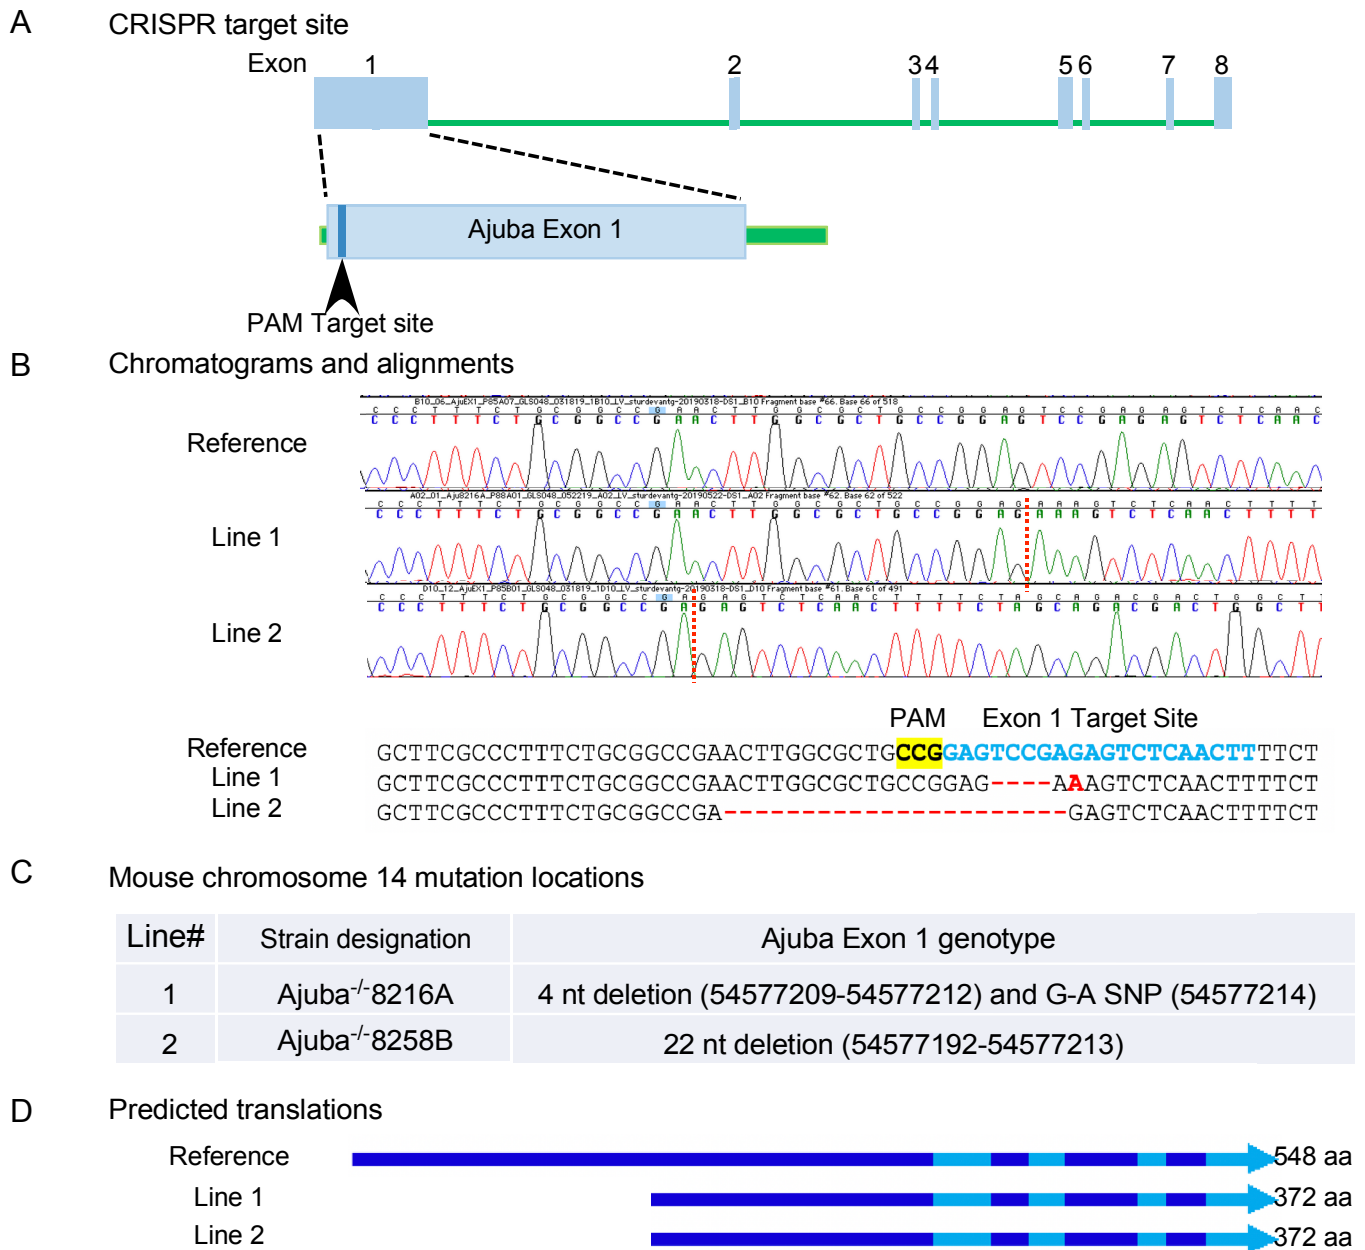

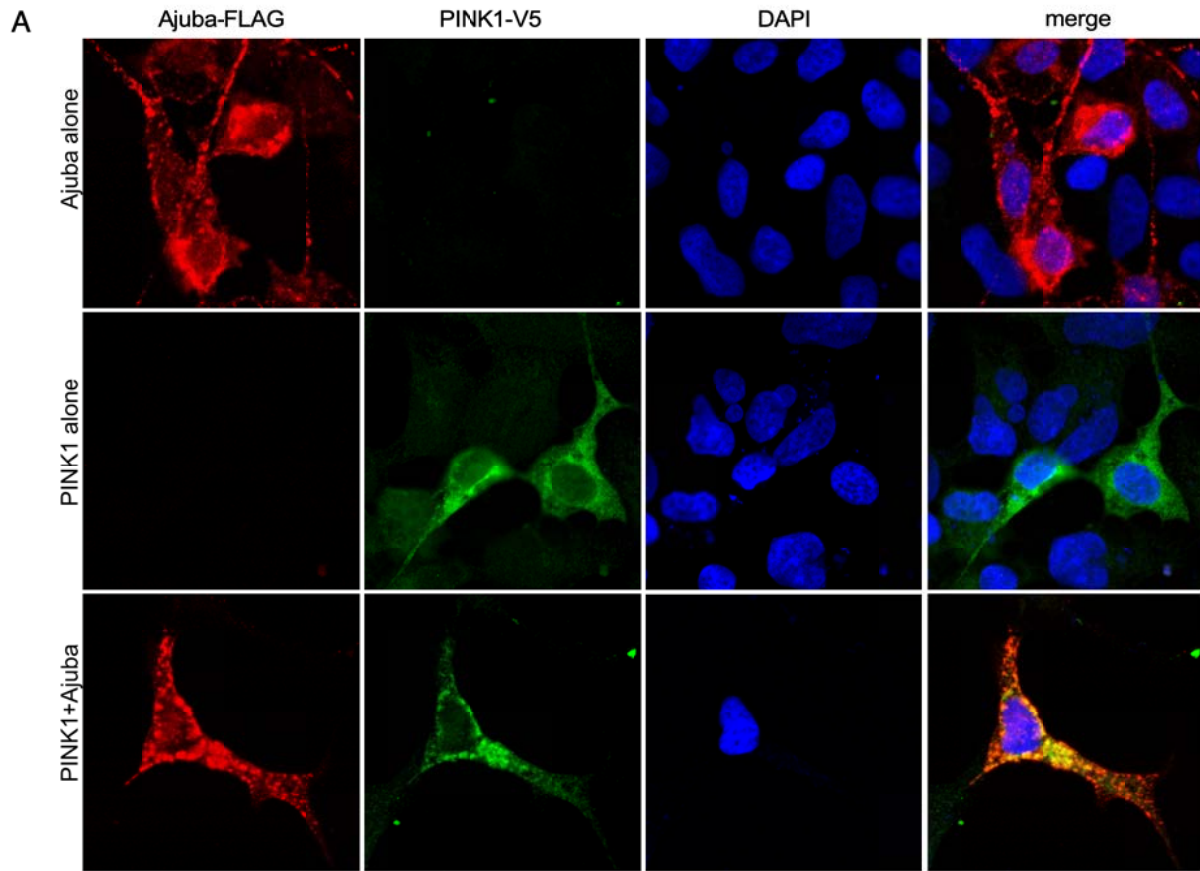

**B** Predicted phosphorylation sites:

**PINK1(S39/S136)**

**TBK1(S69/S104/S141)**

**AKT/PKA/PKB/PKC(S79)**

**CDK1(S119, S175)**

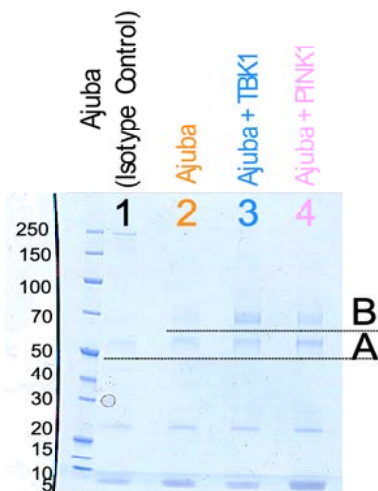

**C** Mass spectrometry data:

```

MERLGEKASR LLEKFGRRK G ESSRSGSDGT PGPKGRLSG LGGPRKSGPR 50
GATGGPGDEP LEPAREQSL DAERNQRGSF EAPRYEGSFP AGPPTRALP 100
LPQSLPPDFR LEPTAPALSP RSSFASSAS DASKPSSPRG SLLLDGAGAG 150
GAGGSRPCSN RTSGISMGYD QRHGSPLPAG PCLFGPPLAG APAGYSPGGV 200
PSAYPELHAA LDRLYAQRPA GFGCQESRHS YPPALGSPGA LAGAGVGAAG 250
PLERRGAQPG RHSVVTGYGDC AVGARYQDEL TALLRLTVGT GCREAGARGE 300
PSGIEPSGLE EPPGPFVPEA ARARMREPEA REDYFGCIK CNKGIYQSN 350
ACQALDSLH TQCFVCCSCG RTLRCFAFYS VNGSVYCEED YLFSGFQEA 400
EKCCVCGHLI LEKILQAMGK SYHPGCFRCI VCNKCLDGIP FTVDPSNQVY 450
CVTDYHKNYA PKCAACGQPI LPSEGCEIV RVISMARDYH FECYHCEDCR 500
MQLSDEBEGCC CFPLDGHLLC HGCHMQLRNA RQPPANYI
    
```

**AJUBA PHOSPHORYLATION**

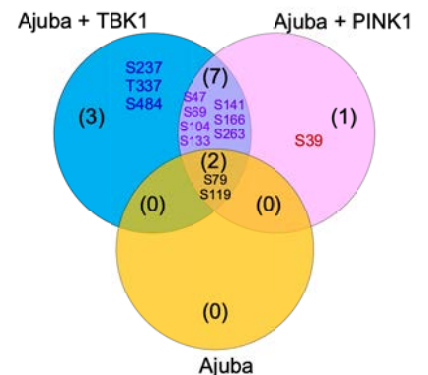

| Site | 2A | 2B | 3A | 3B | 4A | 4B |
|------|----|----|----|----|----|----|
| S39  | 0  | 0  | 0  | 0  | 0  | 2  |
| S69  | 0  | 0  | 1  | 5  | 0  | 1  |
| S104 | 0  | 0  | 1  | 3  | 0  | 1  |
| S141 | 0  | 0  | 0  | 1  | 0  | 2  |
| S79  | 0  | 3  | 0  | 3  | 0  | 1  |
| S119 | 1  | 1  | 1  | 2  | 1  | 3  |
| S166 | 0  | 0  | 2  | 4  | 0  | 1  |
| S133 | 0  | 0  | 0  | 2  | 0  | 0  |
| S47  | 0  | 0  | 0  | 1  | 0  | 1  |

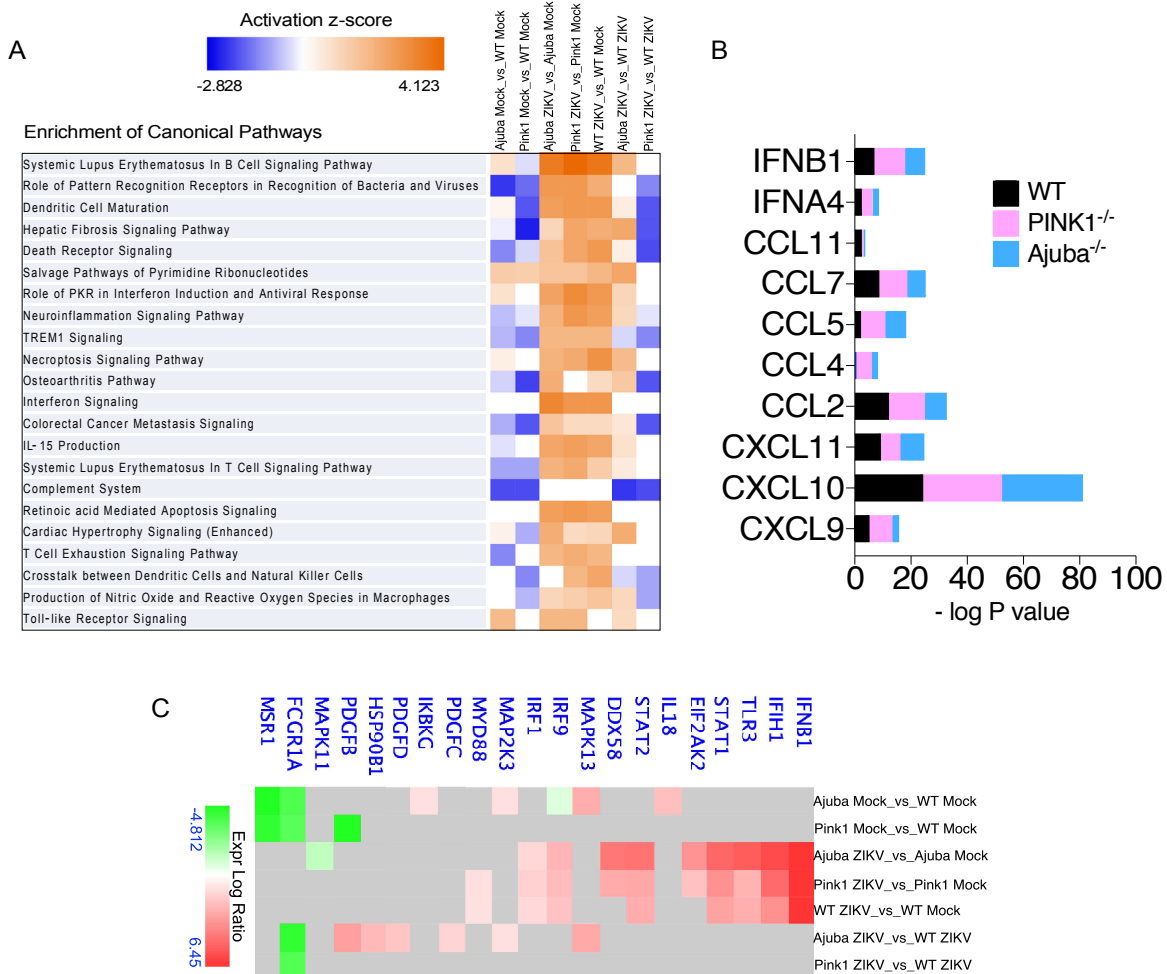



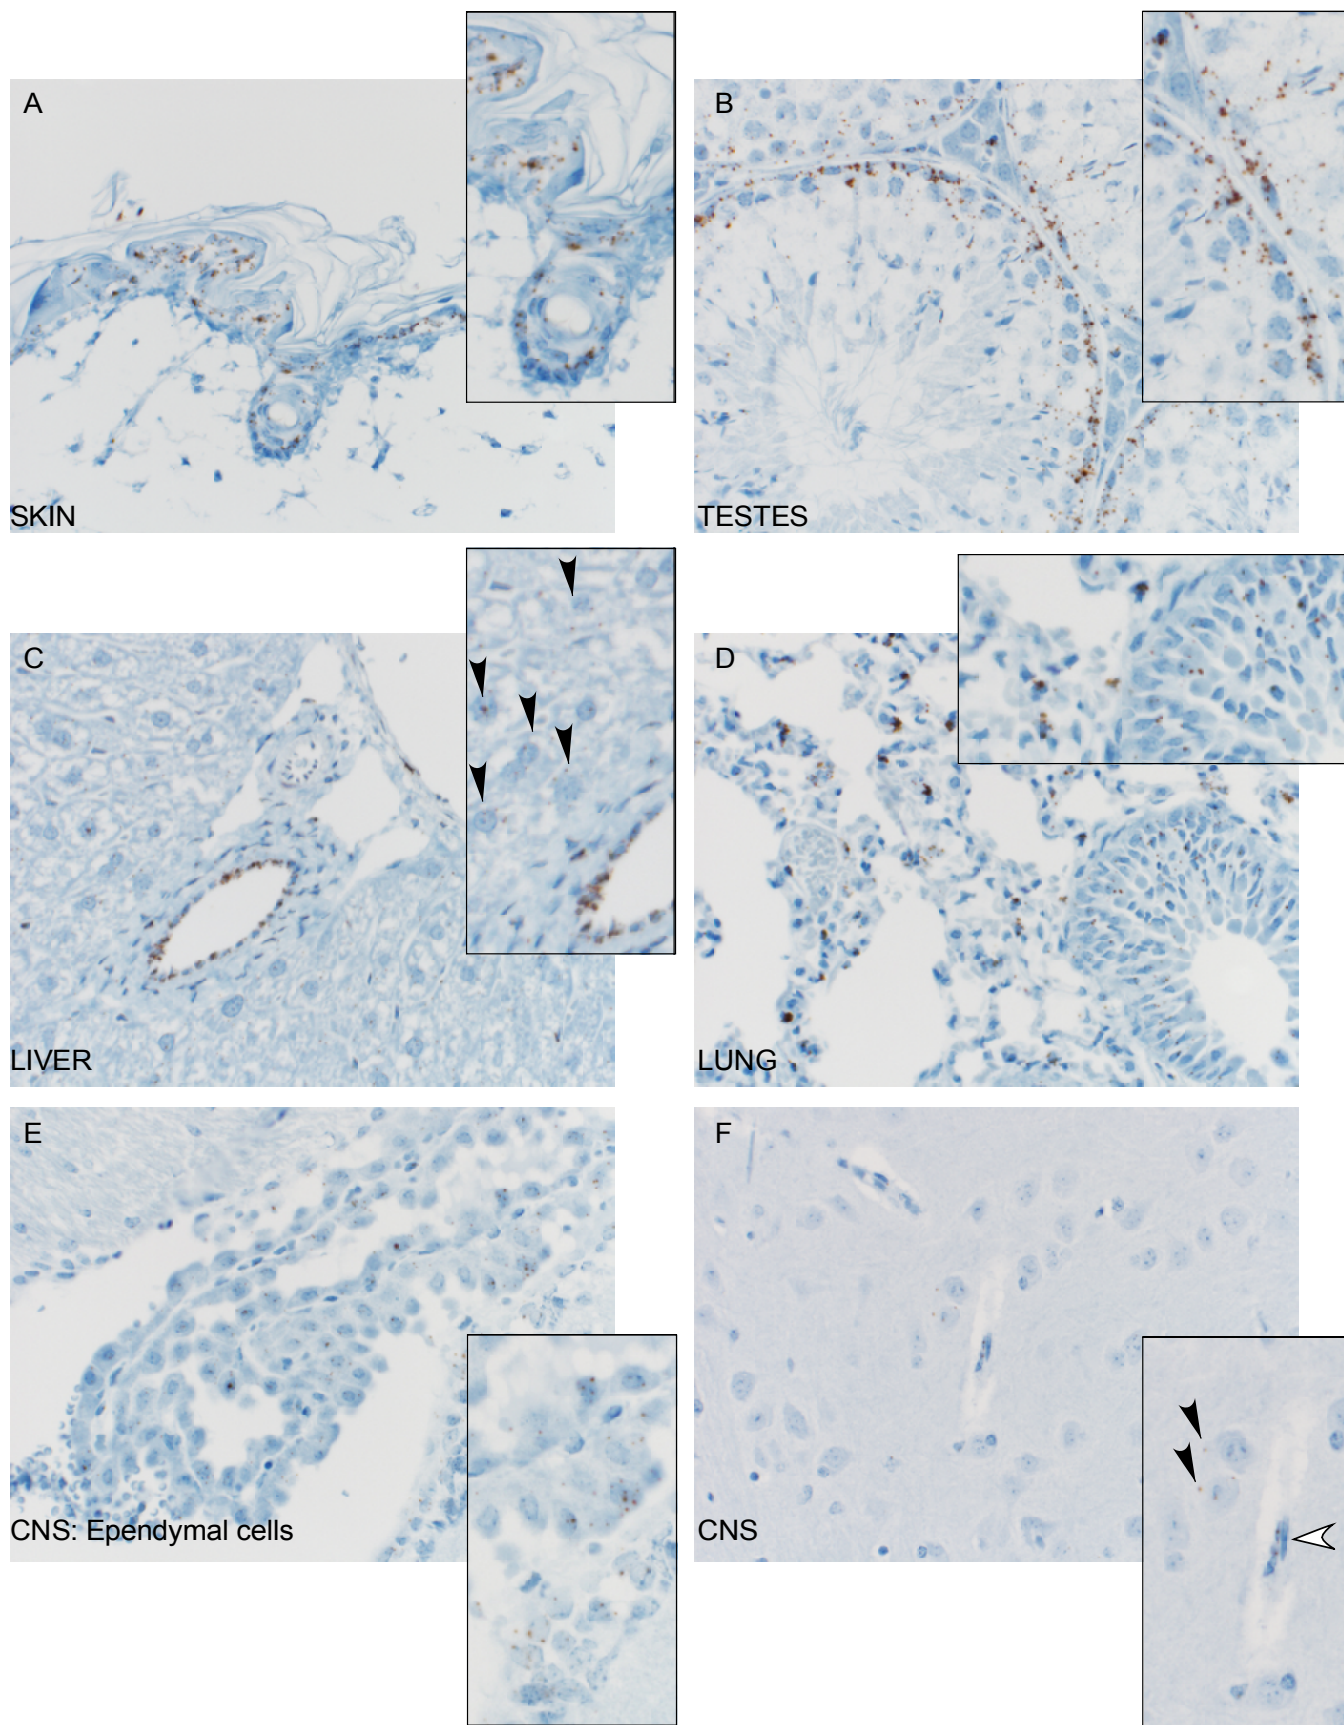

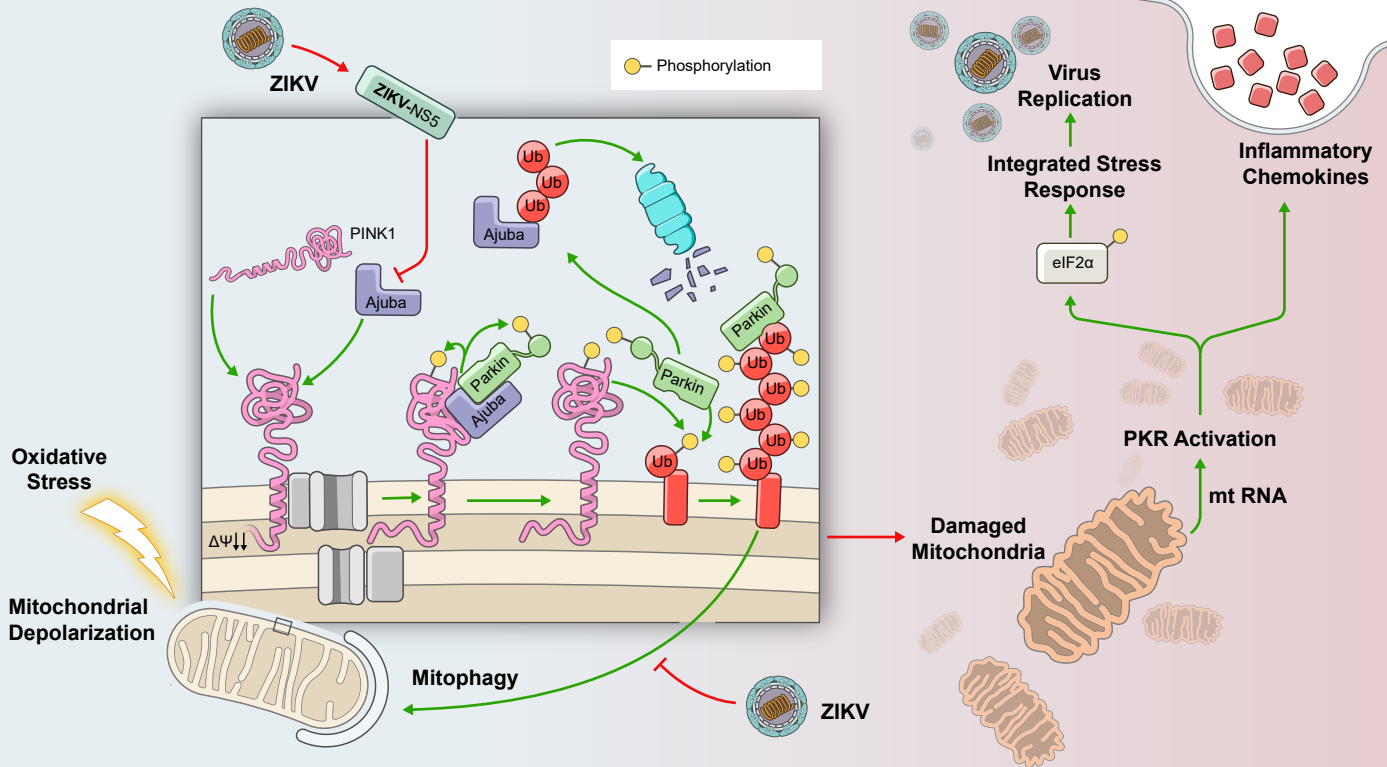

Source: https://biorxiv.org/content/10.1101/2021.01.29.428870v1.full.pdf
